# Supplementary material
Source: PubMed Central journal article supplement (PMC11636943)

## Supporting Information

### Concise Total Synthesis of Complanadine A Enabled by Pyrrole-to-Pyridine Molecular Editing

Brandon S. Martin<sup>a,†</sup>, Donghui Ma,<sup>a,b†</sup> Takeru Saito<sup>a</sup>, Katelyn S. Gallagher<sup>a</sup>, Mingji Dai<sup>\*a,b</sup>

<sup>a</sup>Department of Chemistry, Purdue University, West Lafayette, Indiana 47907, United States

<sup>b</sup>Department of Chemistry, Emory University, Atlanta, Georgia 30322, United States

dma-1-42-2.1.fid

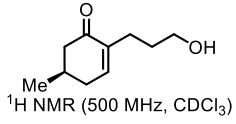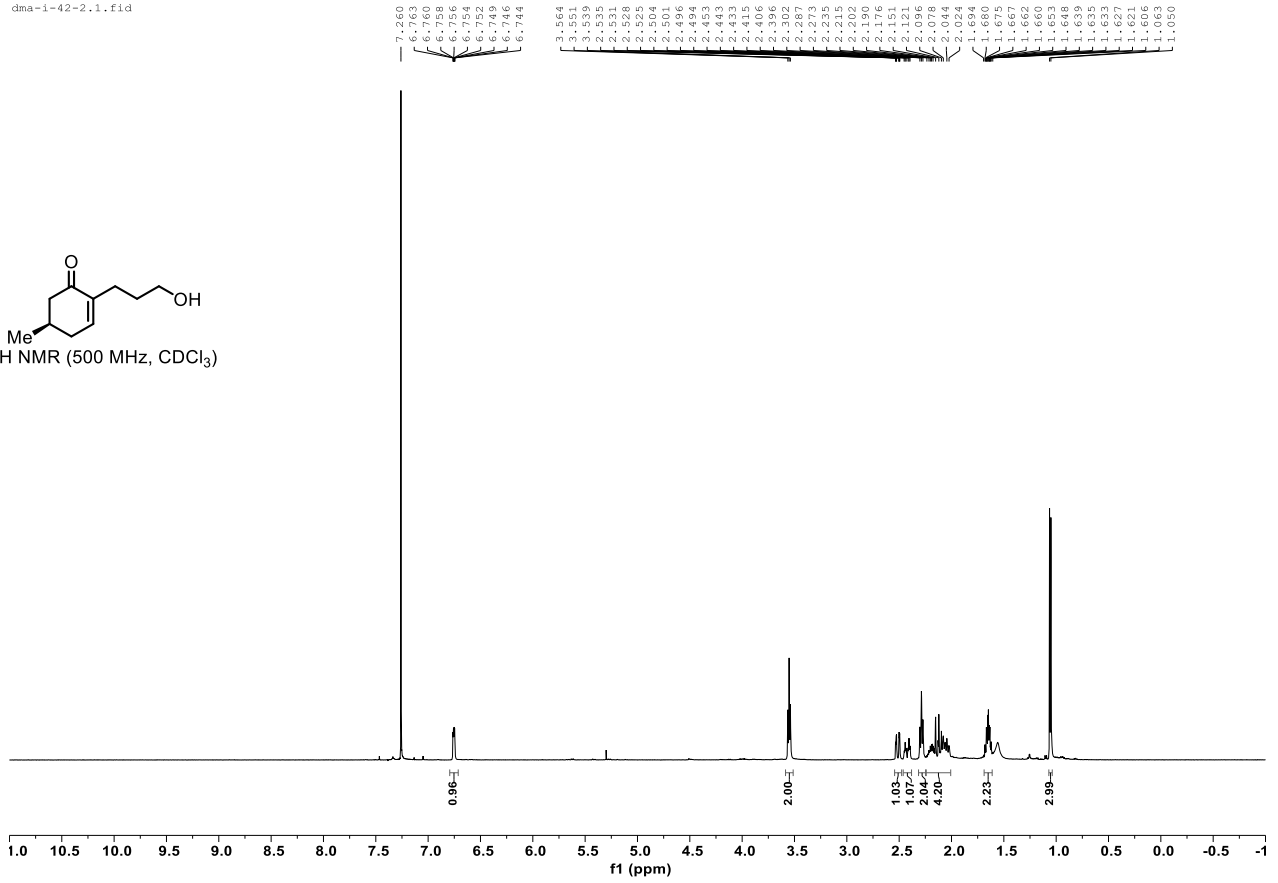

dma-1-42-2.2.fid

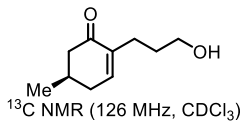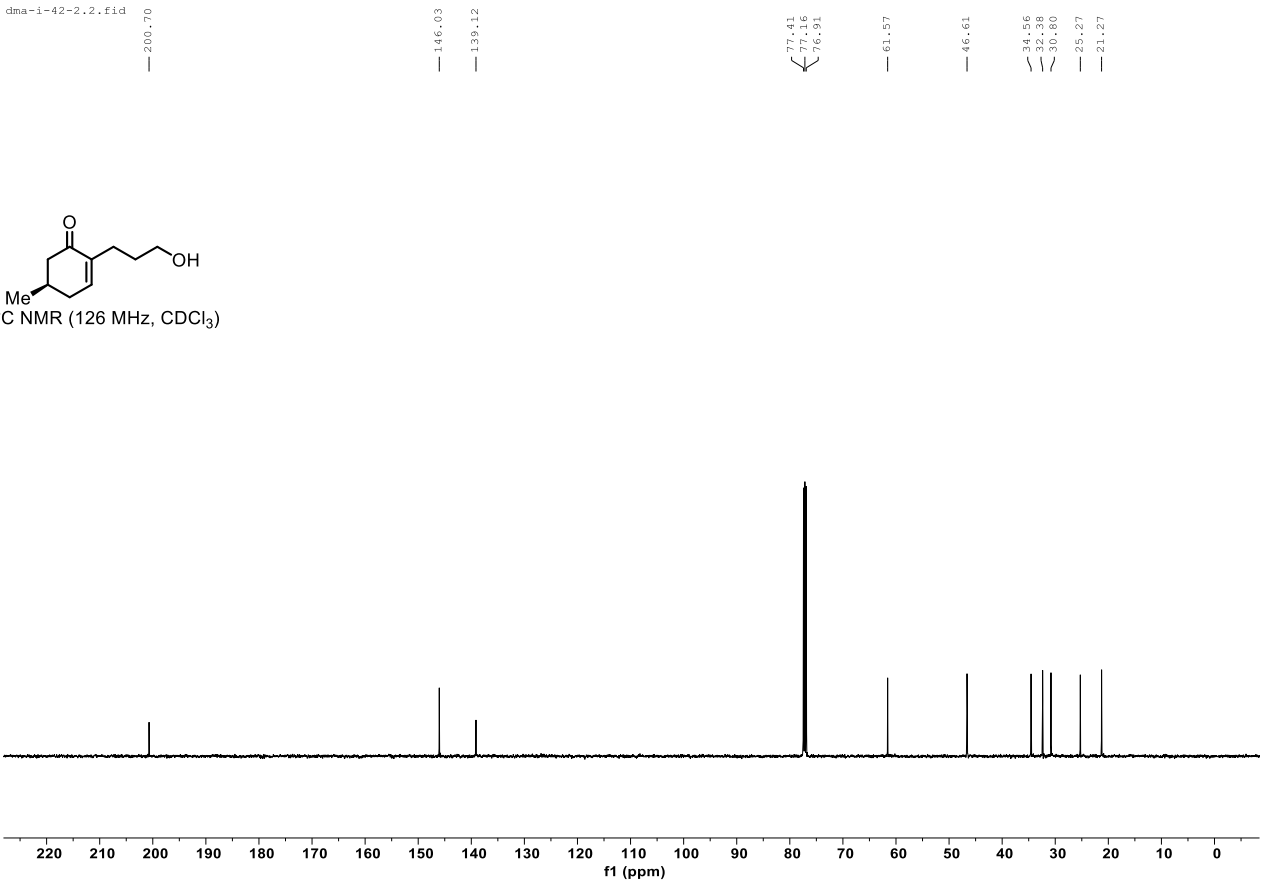

dma-i-42-1.1.fid

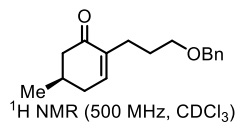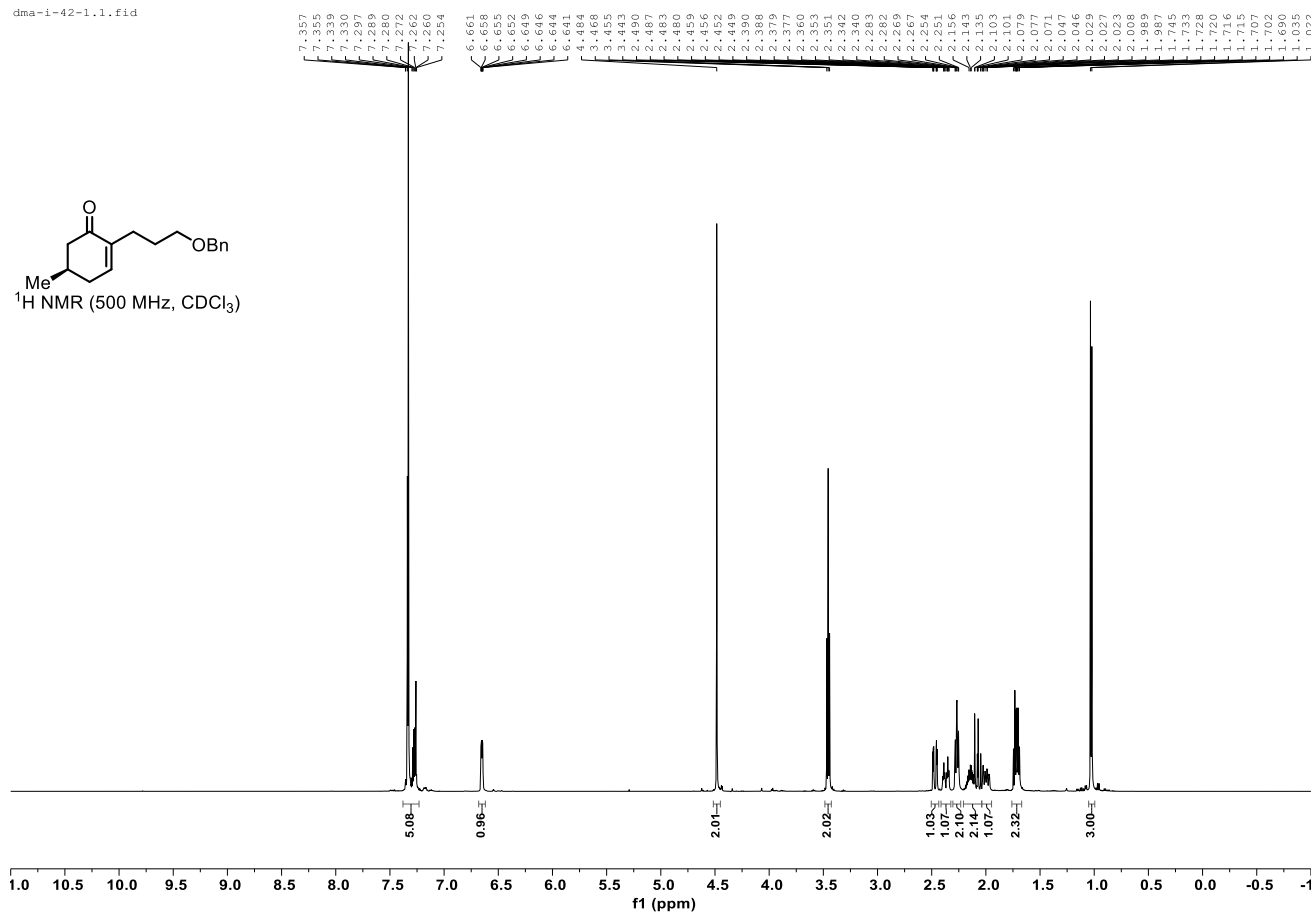

dma-i-42-1.2.fid

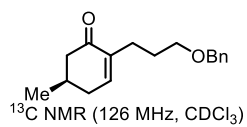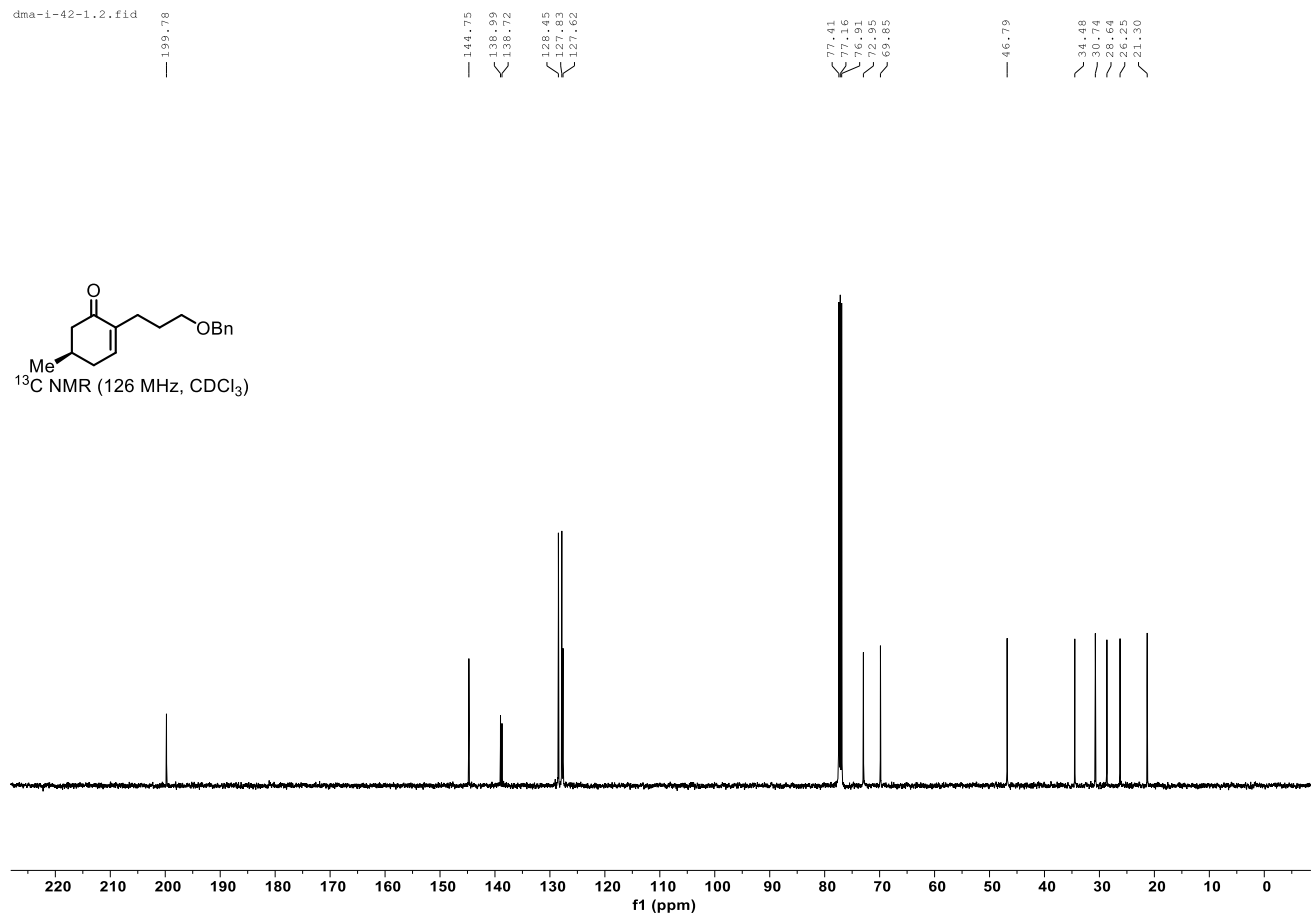

dma-ii-034pro.1.fid - dma-ii-34pro

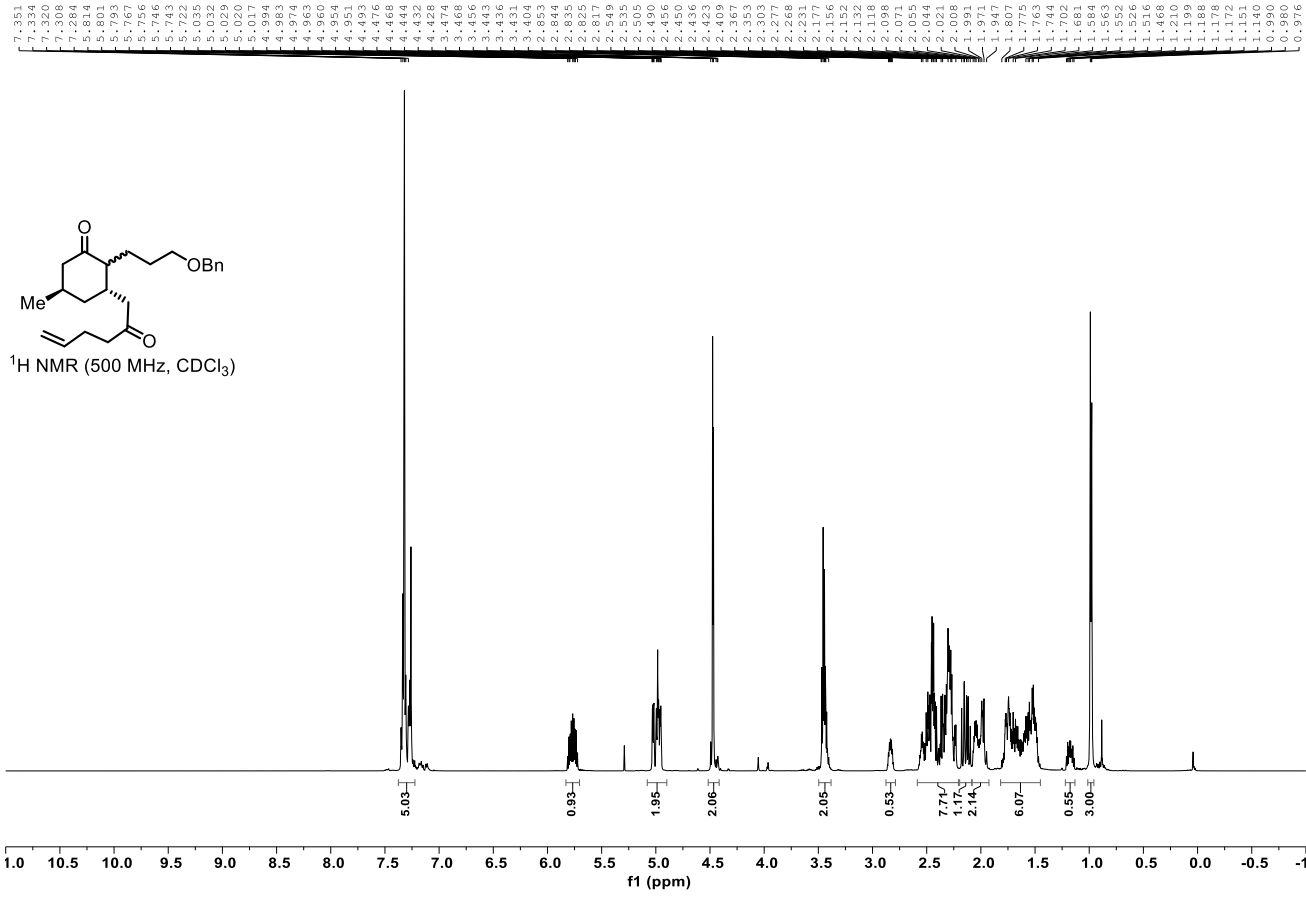

dma-ii-034pro.2.fid - dma-ii-34pro

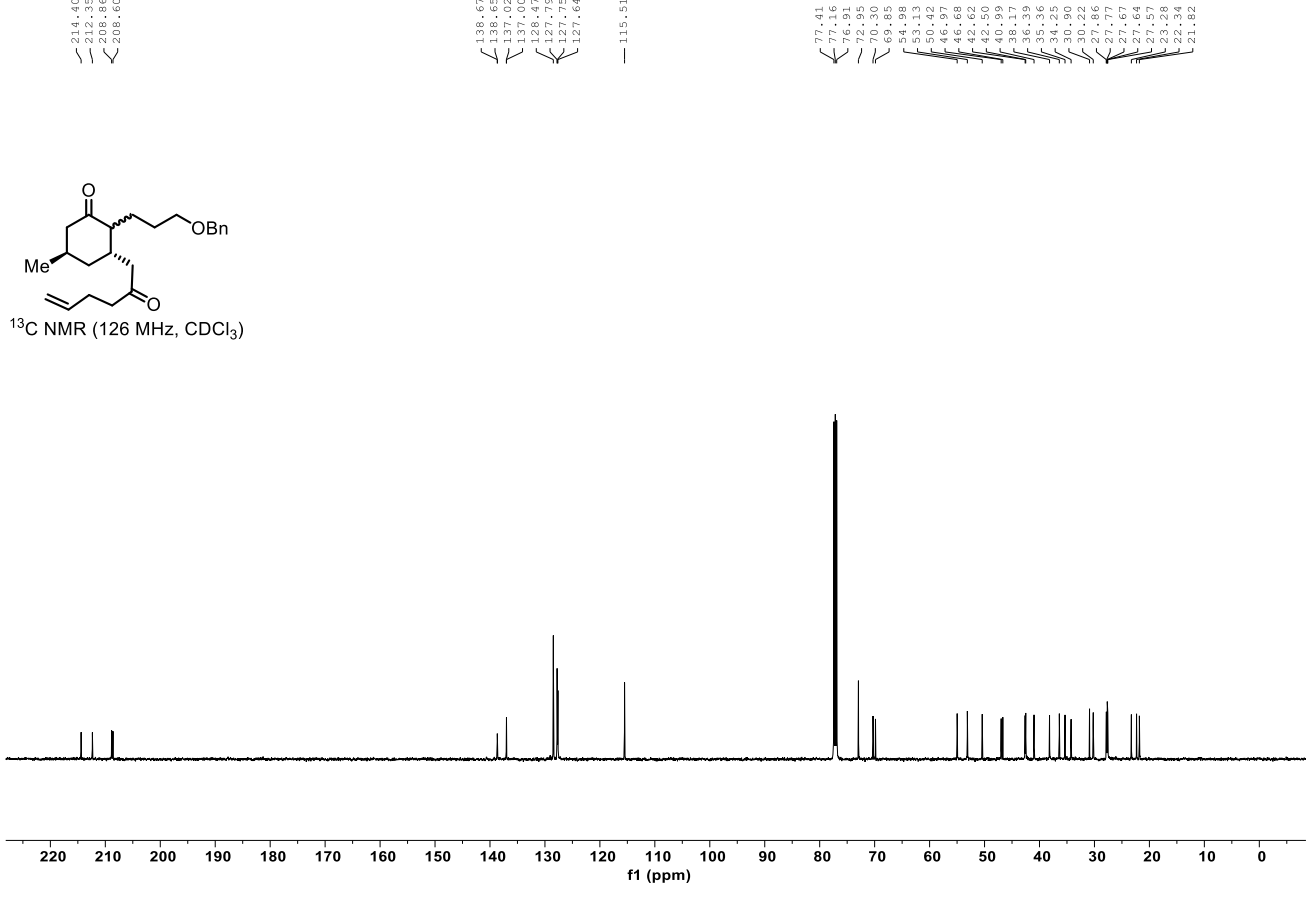

dma-i-21-1.1.fid

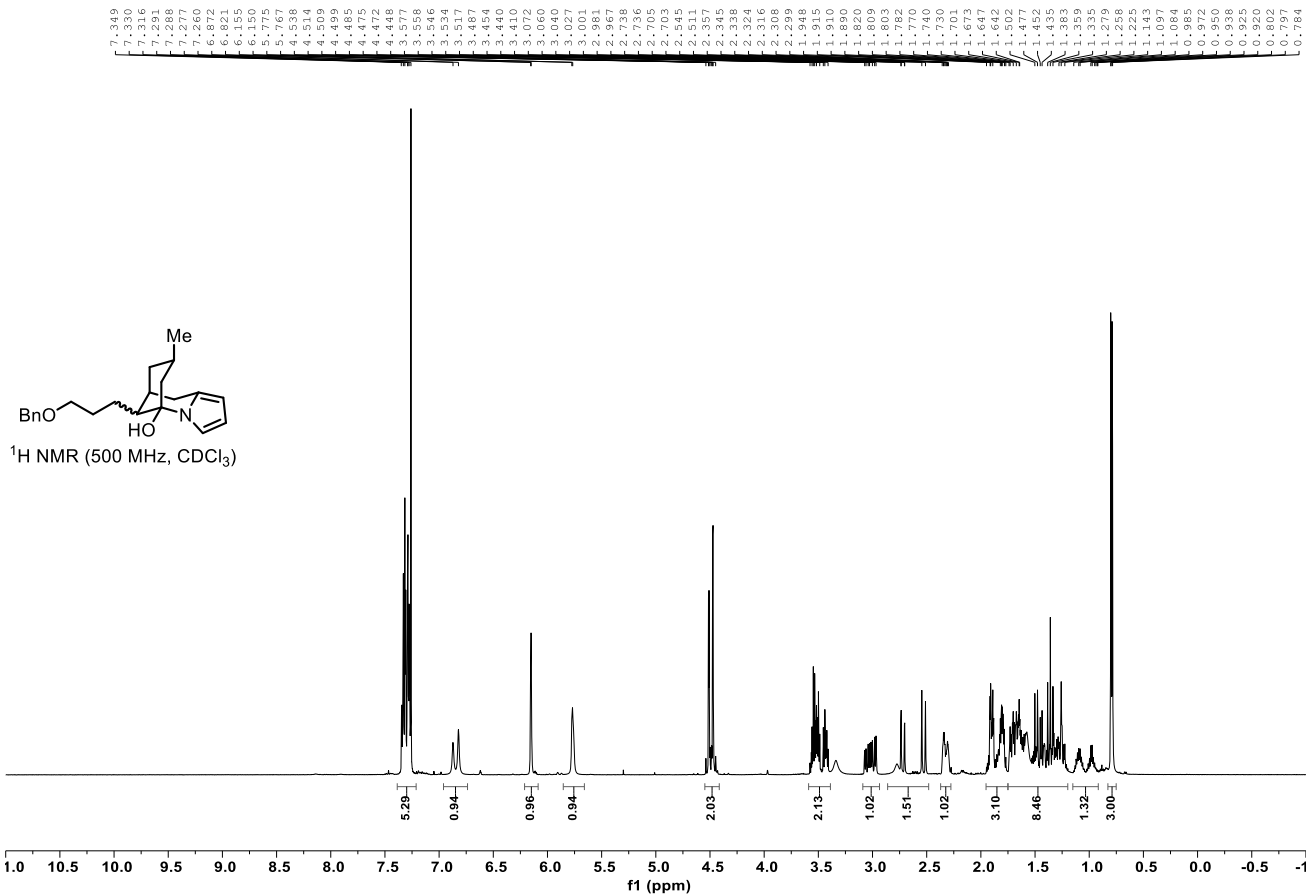

dma-i-59pro.2.fid

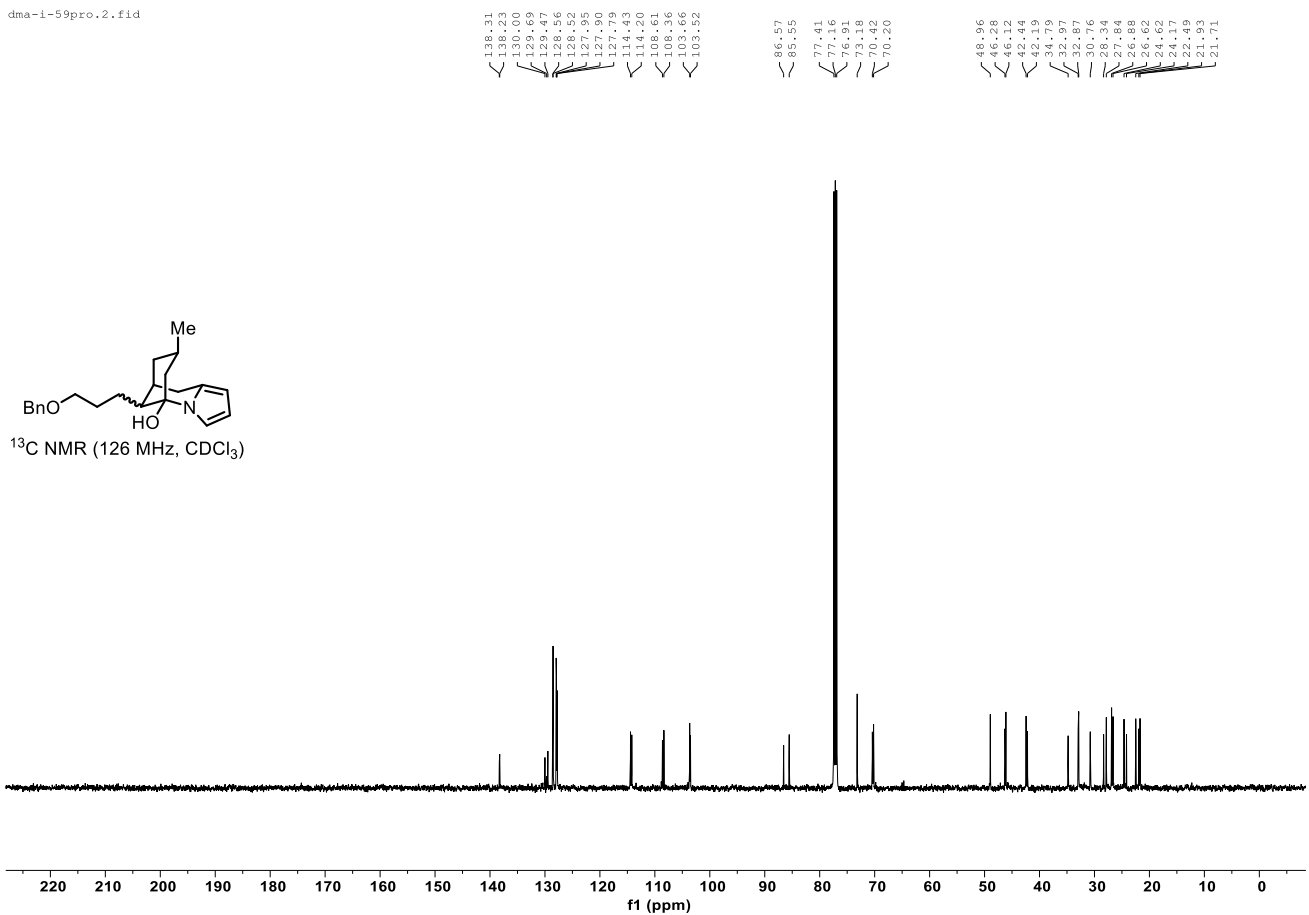

dma-ii-082pro.1.fid  
dma-ii-82pro

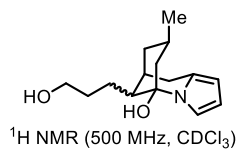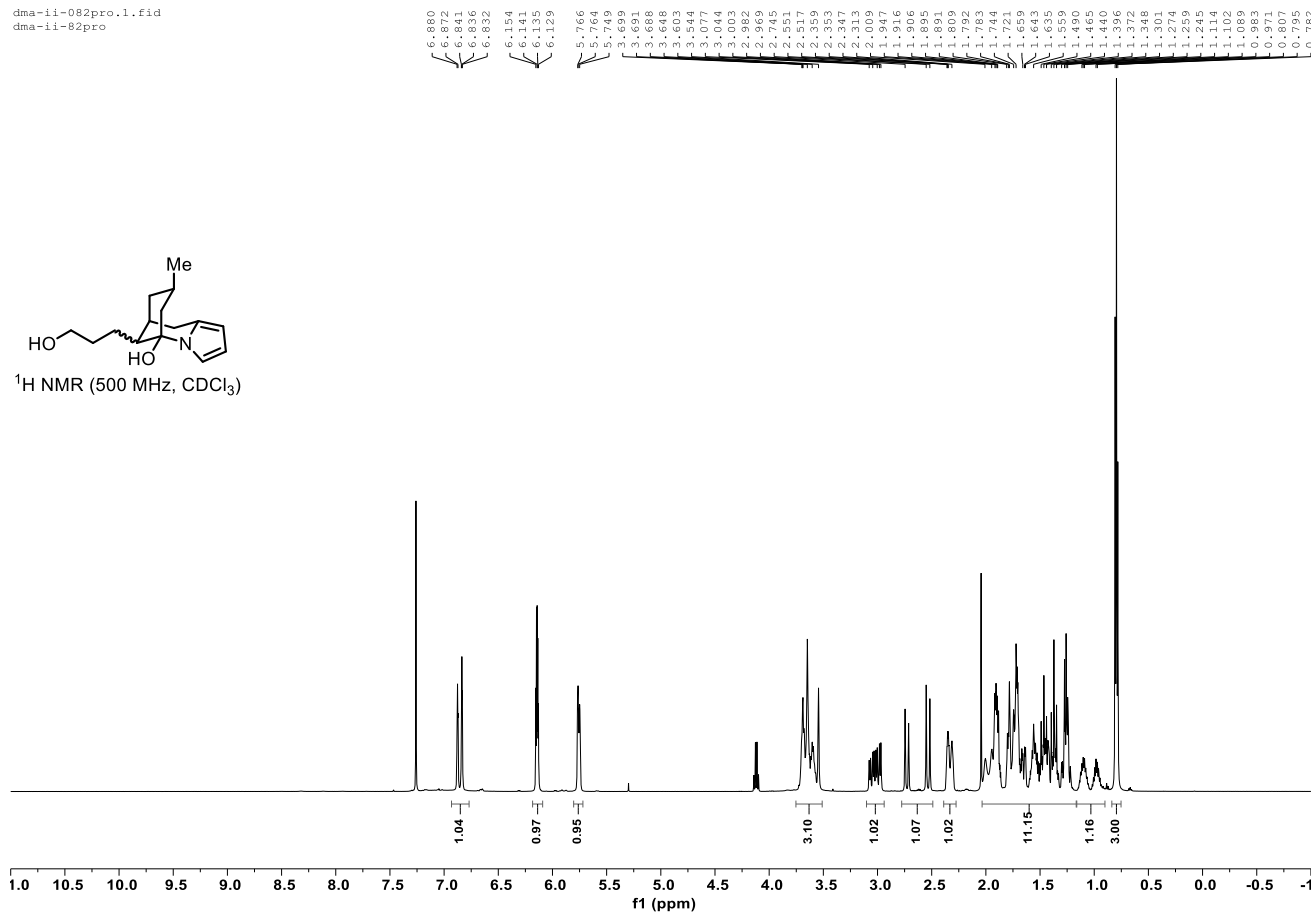

dma-i-62.22.fid

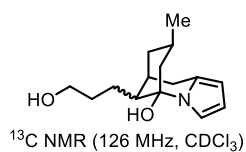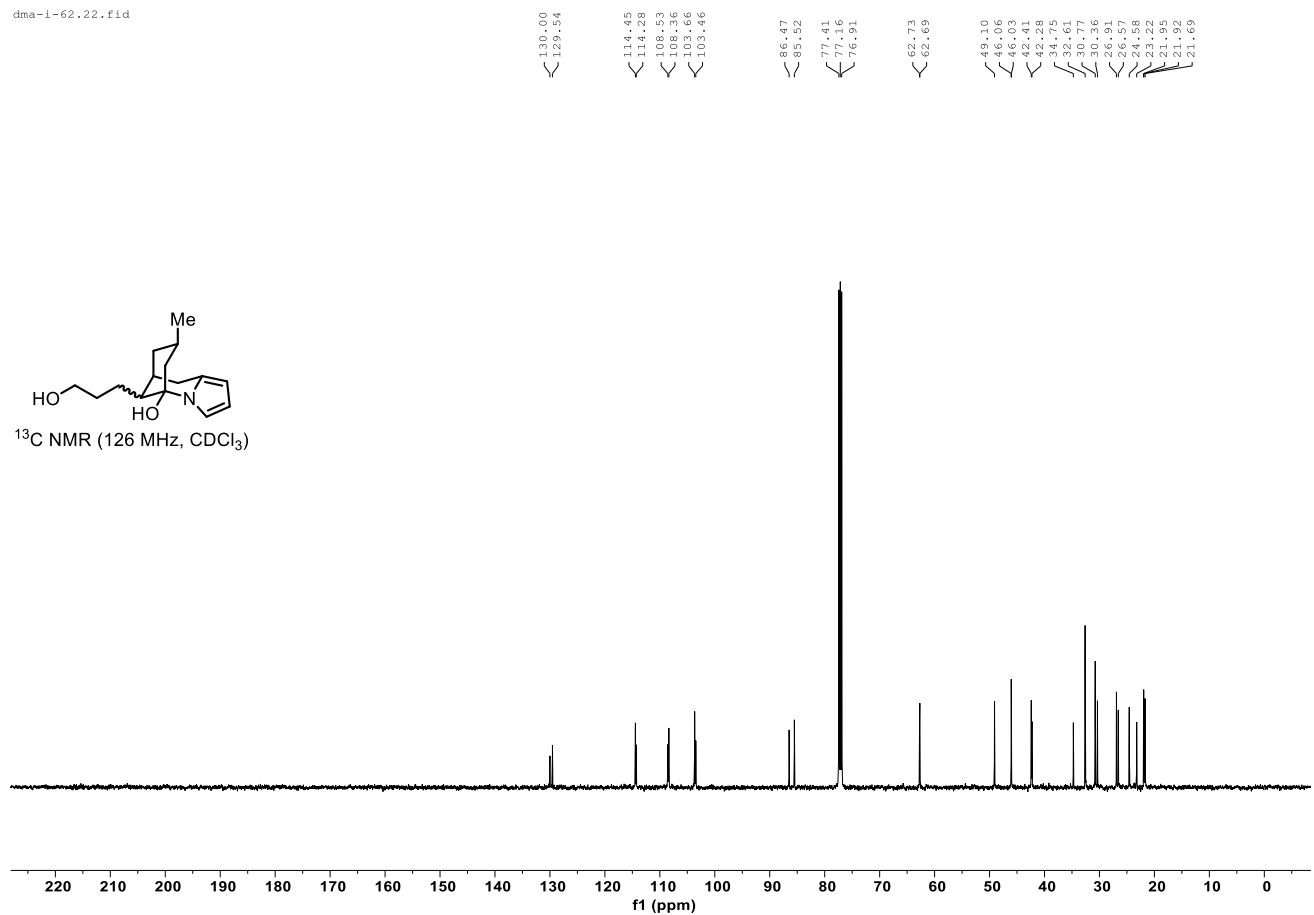

20230415-dma-iii-108pure.1.fid -

9.013  
9.007  
8.893  
8.888  
8.638  
8.633  
8.116  
8.111  
8.106  
7.772  
7.766  
7.260

4.156  
4.150  
4.144  
4.130  
4.123  
4.116  
4.109  
3.310  
3.292  
3.262  
3.243  
2.907  
2.896  
2.878  
2.873  
2.868  
2.863  
2.809  
2.804  
2.465  
2.442  
2.435  
2.431  
2.401  
2.218  
2.201  
2.201  
2.192  
1.899  
1.836  
1.752  
1.648  
1.622  
1.552  
1.387  
1.378  
1.305  
1.294  
1.272  
1.261  
1.251  
1.241  
0.868

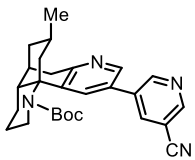

<sup>1</sup>H NMR (400 MHz, CDCl<sub>3</sub>)

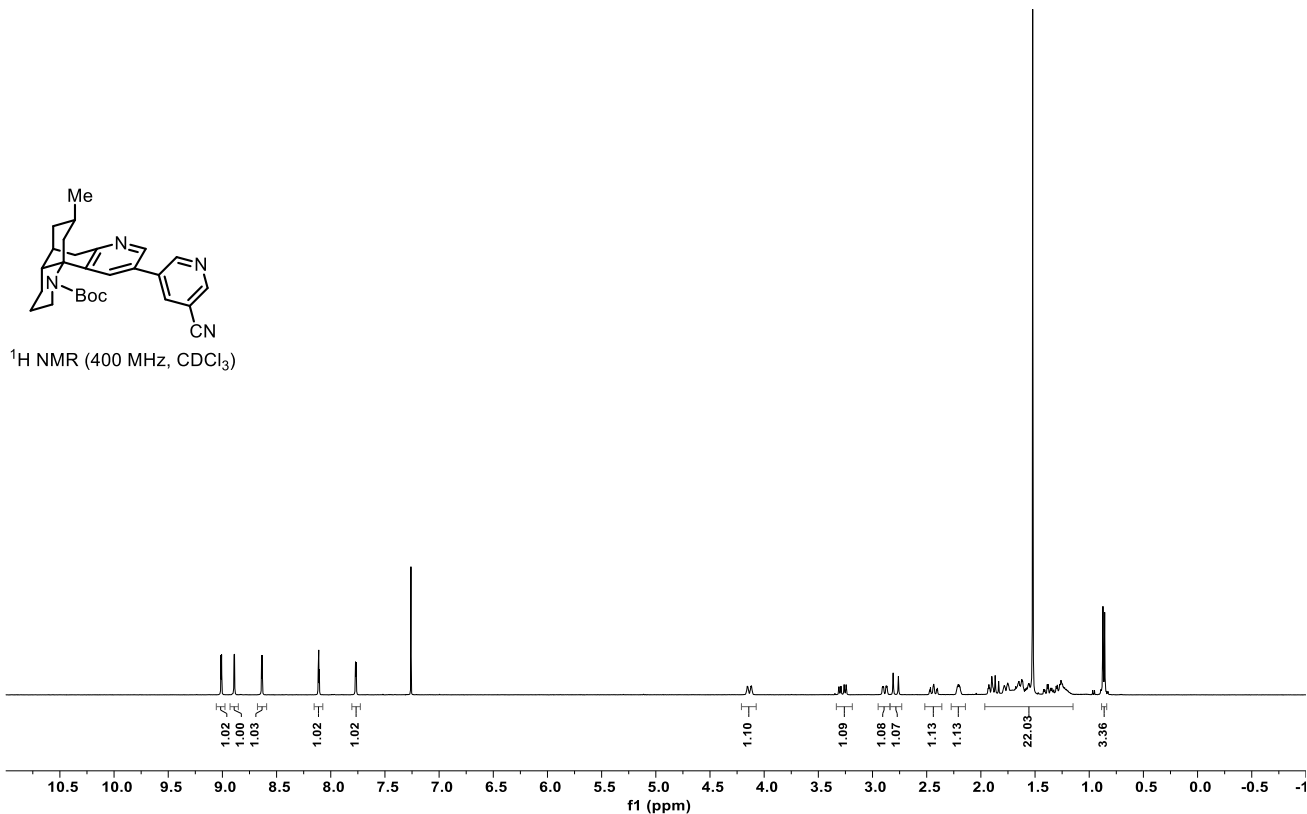

20230415-dma-iii-108pure.2.fid

159.52  
156.54  
151.33  
151.28  
145.44  
137.17  
136.70  
134.19  
132.63  
129.66  
116.38  
110.49

80.95  
77.58  
77.56  
76.84  
64.06

48.28  
44.55  
43.59  
43.00  
35.05  
34.34  
28.69  
27.74  
26.74  
25.69  
22.48

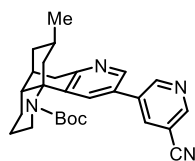

<sup>13</sup>C NMR (101 MHz, CDCl<sub>3</sub>)

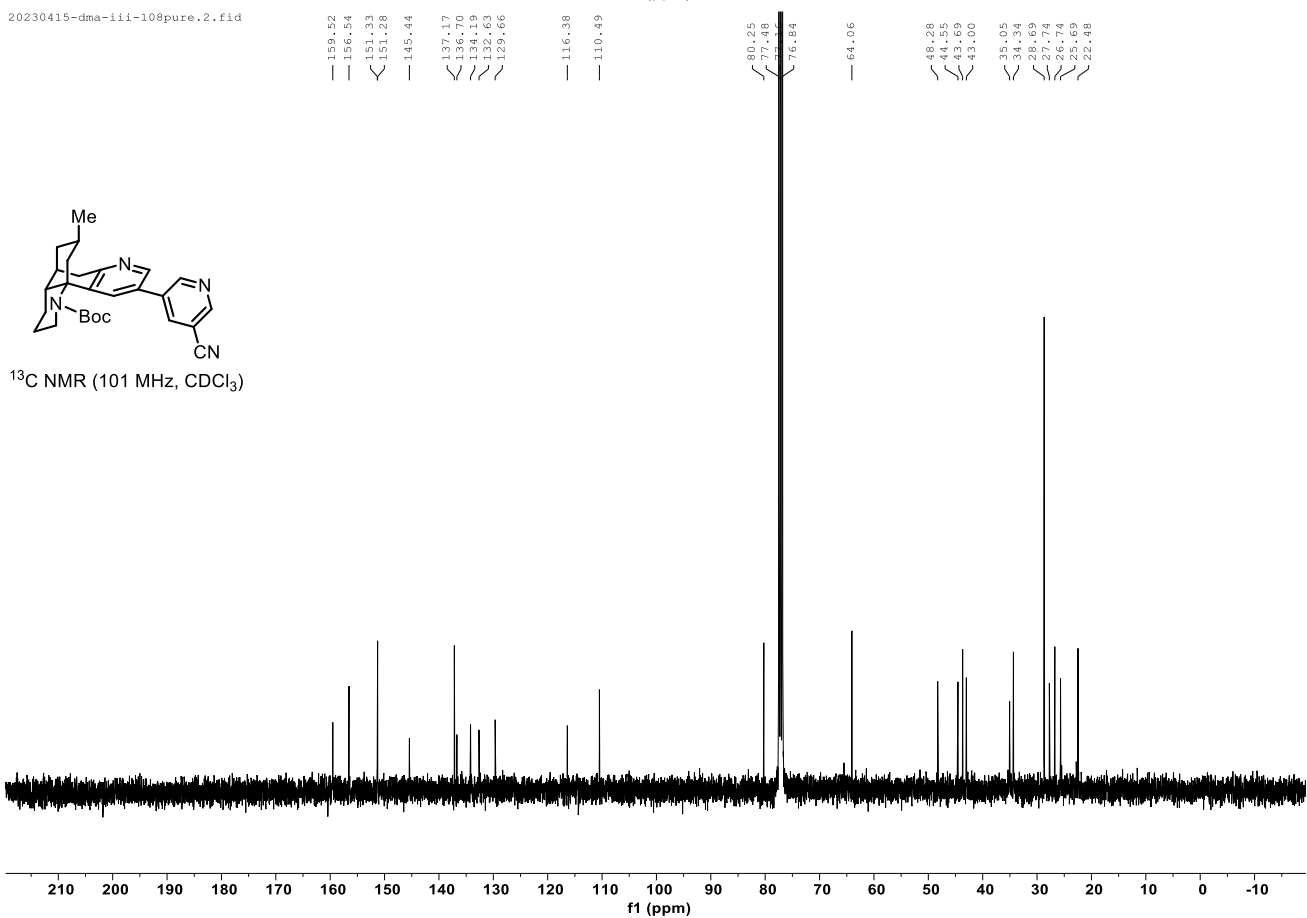

20230415-dma-iii-109.11.fid - dma-iii-109A

9.152  
9.146  
8.780  
8.774  
8.306  
8.300  
8.163  
8.141  
7.874  
7.870  
7.771  
7.768  
7.754  
7.751  
7.747  
7.733  
7.729  
7.624  
7.621  
7.606  
7.603  
7.600  
7.586  
7.583  
7.560

4.183  
4.177  
4.171  
4.150  
4.136

3.325  
3.307  
3.277  
3.259

2.935  
2.930  
2.911  
2.907  
2.902  
2.897  
2.818  
2.770  
2.600  
2.497  
2.494  
2.218  
2.210  
2.201  
2.192  
1.892  
1.891  
1.889  
1.859  
1.797  
1.766  
1.766  
1.526  
1.526  
1.386  
1.355  
1.312  
1.239  
0.873

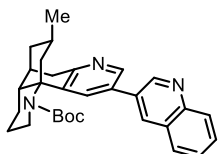

<sup>1</sup>H NMR (400 MHz, CDCl<sub>3</sub>)

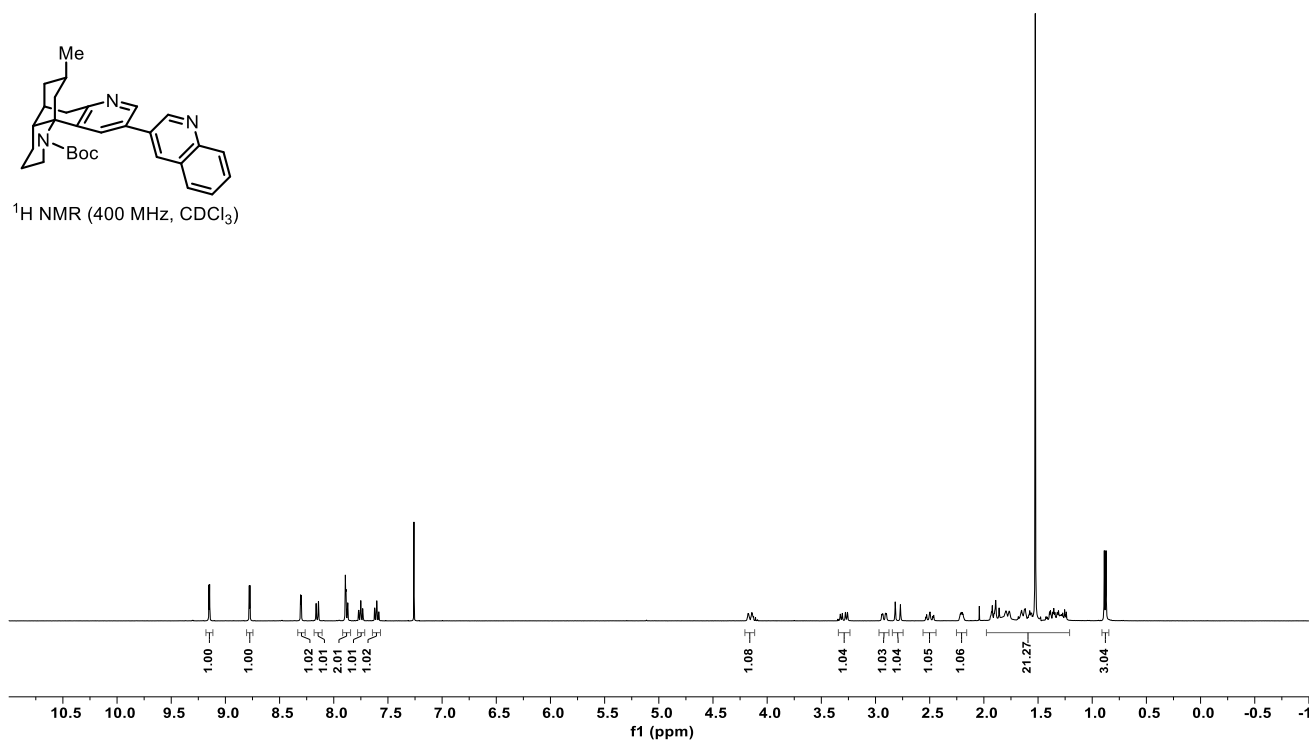

20230415-dma-iii-109.12.fid  
dma-iii-109A

158.00  
156.56  
149.37  
147.69  
145.92  
136.22  
133.42  
132.64  
132.06  
130.84  
129.92  
129.46  
128.10  
128.05  
127.45

80.08

64.21

48.46  
44.47  
43.13  
43.11  
35.02  
34.45  
28.74  
27.83  
26.77  
25.79  
22.55

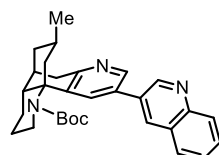

<sup>13</sup>C NMR (101 MHz, CDCl<sub>3</sub>)

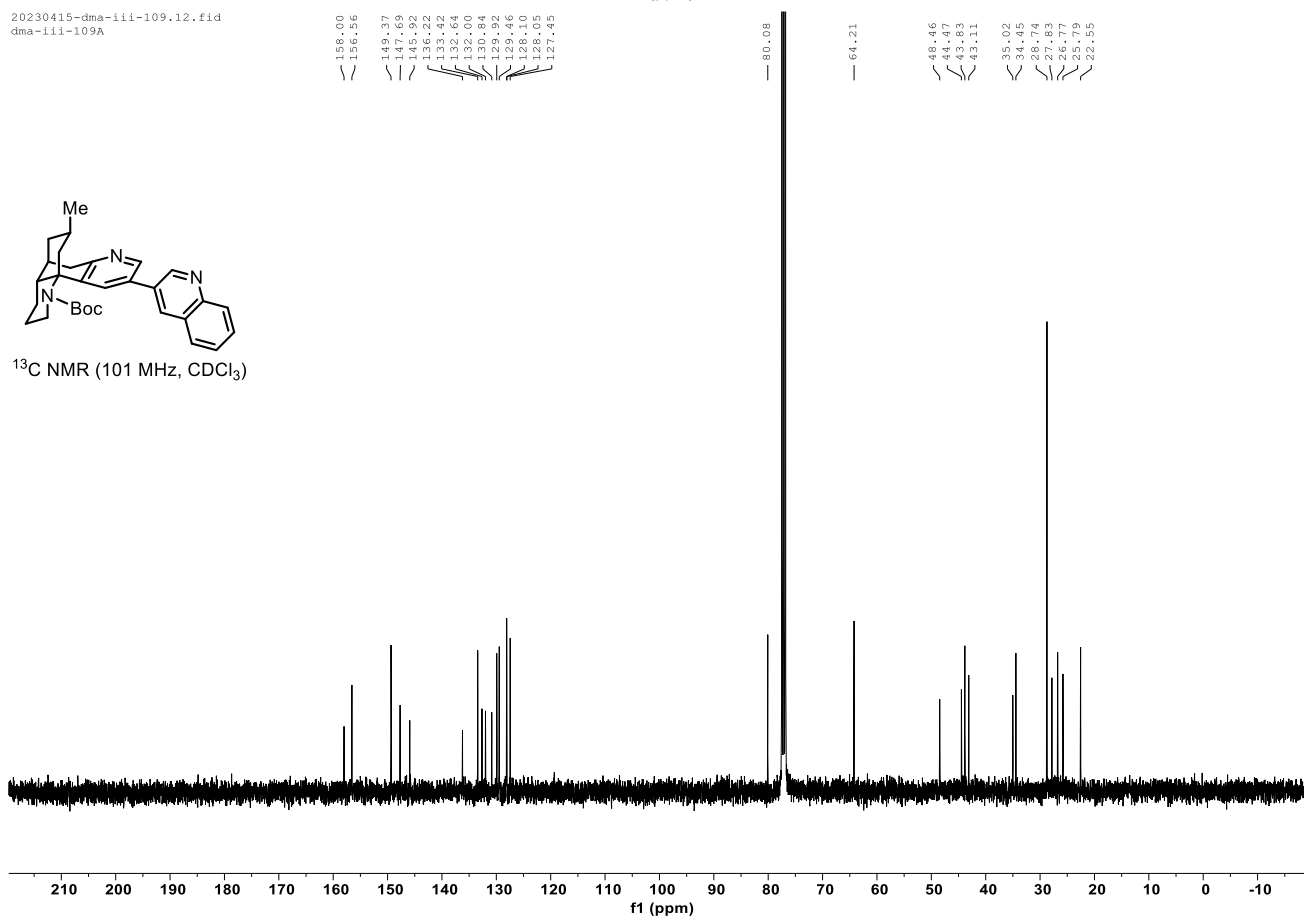



20230415-dma-iii-109.21.fid - dma-iii-109B

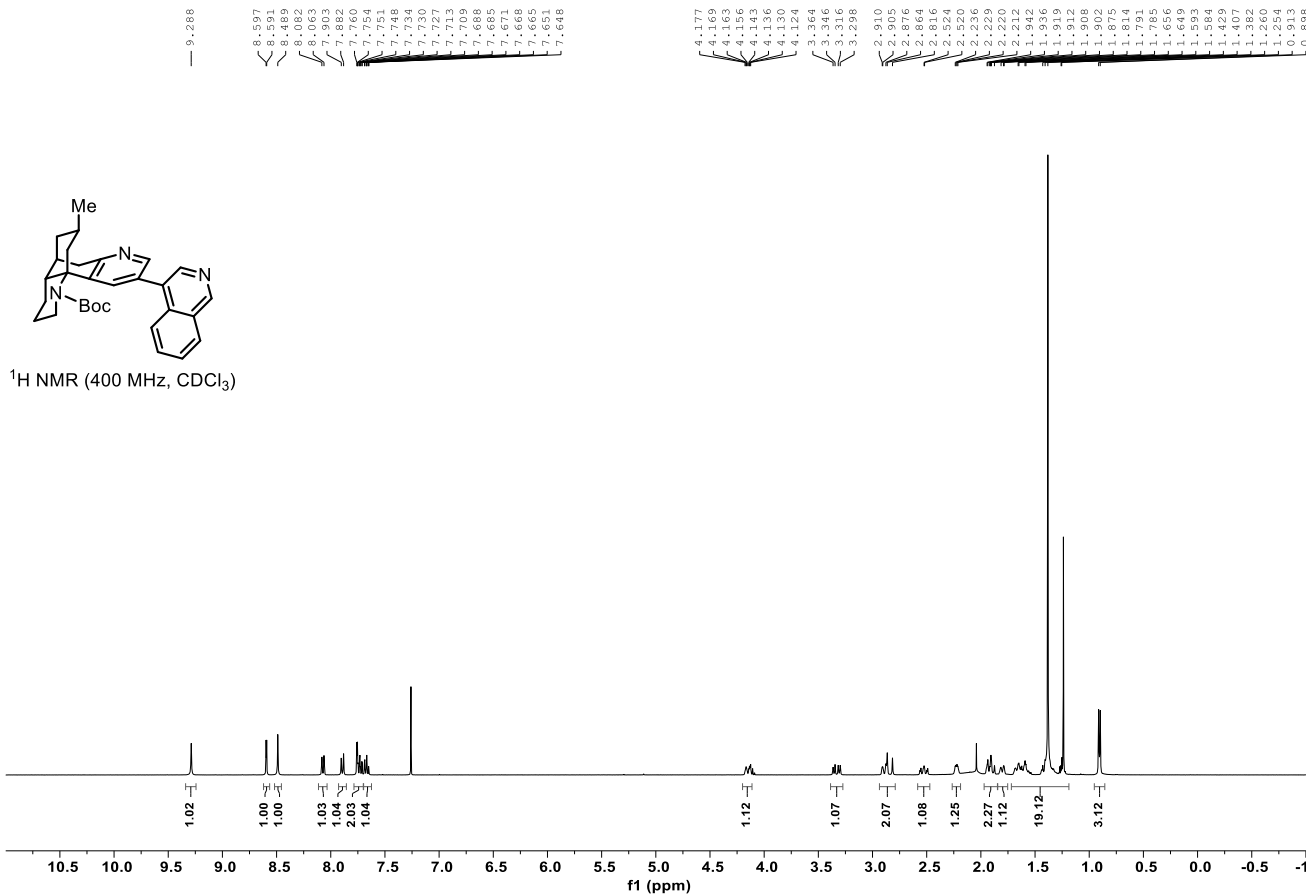

20230415-dma-iii-109.22.fid  
dma-iii-109B

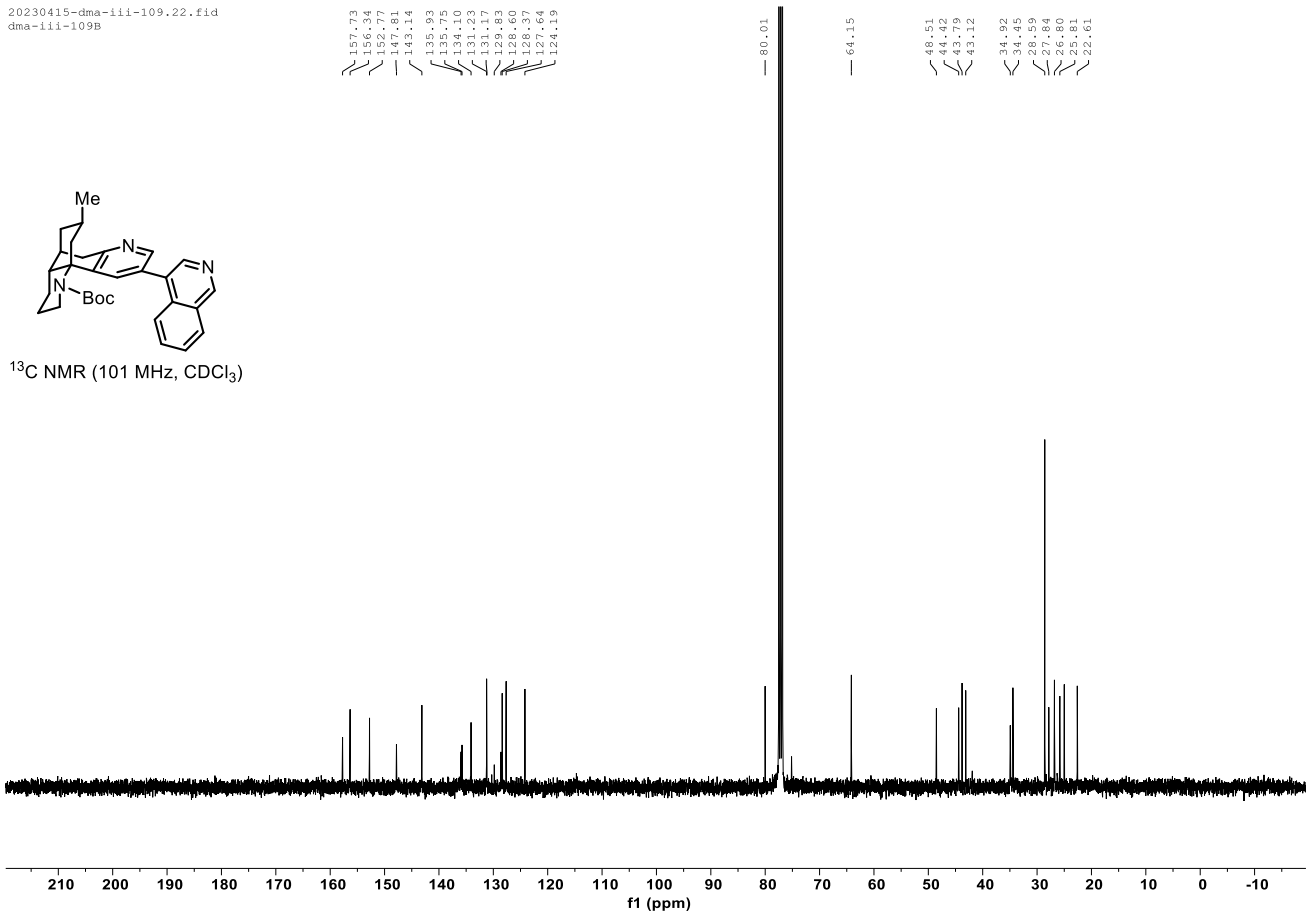

20230417-dma-iii-110.11.fid  
dma-iii-110A

8.483  
8.471  
8.451  
8.407  
8.401

7.553  
7.568  
7.260  
7.225  
7.213

4.157  
4.143  
4.137  
4.130  
4.125  
4.116  
4.106  
4.104  
4.096  
4.090  
3.304  
3.285  
3.266  
3.236

2.838  
2.833  
2.828  
2.805  
2.800  
2.796  
2.787  
2.782  
2.478  
2.451  
2.448  
2.444  
2.314  
2.202  
2.189  
2.184  
2.175  
2.003  
1.908  
1.752  
1.652  
1.609  
1.562  
1.462  
1.367  
1.338  
1.321  
1.297  
1.238  
1.179  
0.863

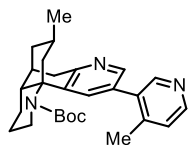

<sup>1</sup>H NMR (400 MHz, CDCl<sub>3</sub>)

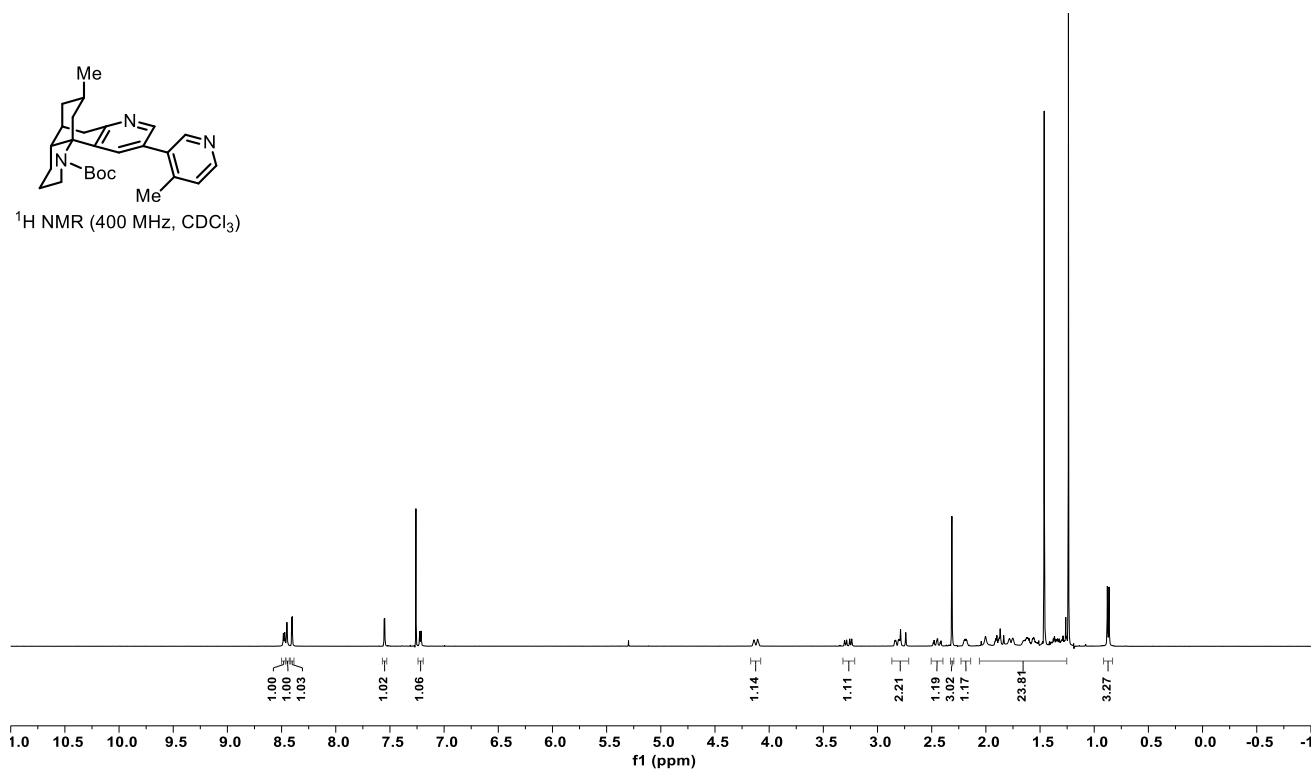

20230417-dma-iii-110.12.fid  
dma-iii-110A

157.52  
156.36  
150.00  
149.02  
147.45  
144.93  
135.45  
134.81  
134.29  
131.79  
125.61

79.99

64.11

48.49  
44.37  
43.16  
43.11  
35.01  
34.44  
28.67  
27.81  
26.77  
25.81  
22.59  
20.07

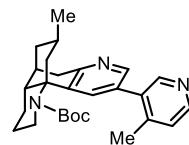

<sup>13</sup>C NMR (101 MHz, CDCl<sub>3</sub>)

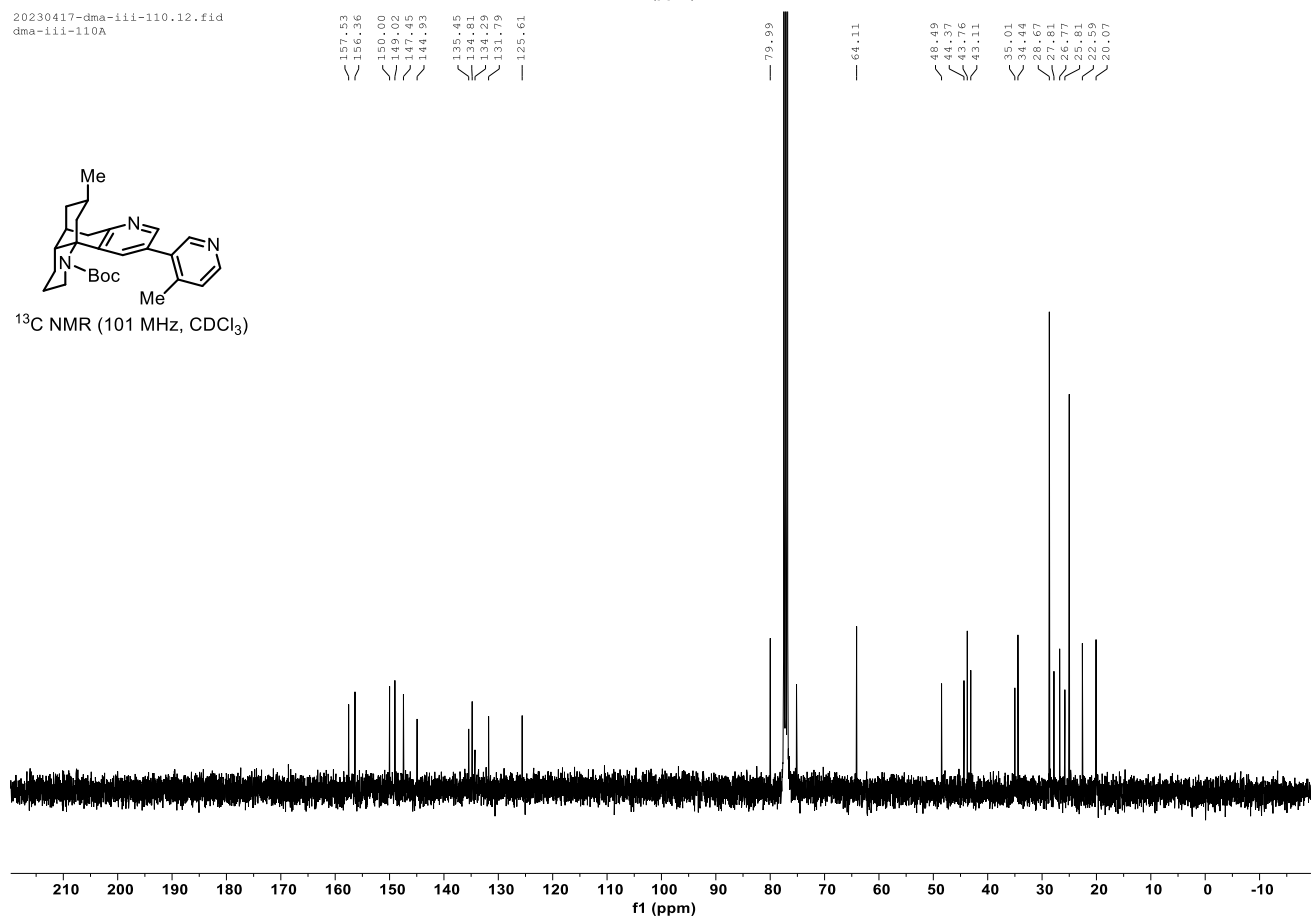

20230417-dma-iii-110.21.fid  
dma-iii-110B

8.698  
8.693  
8.613  
8.607

7.758  
7.752  
7.739  
7.732  
7.714  
7.709  
7.253  
7.233

4.148  
4.142  
4.125  
4.122  
4.114  
4.107  
4.089  
3.283  
3.274  
3.235  
3.217  
2.872  
2.868  
2.862  
2.858  
2.833  
2.835  
2.830  
2.825  
2.769  
2.722  
2.484  
2.477  
2.453  
2.450  
2.446  
2.443  
2.419  
2.412  
2.188  
2.170  
2.170  
2.162  
1.995  
1.895  
1.876  
1.865  
1.861  
1.770  
1.770  
1.739  
1.627  
1.601  
1.593  
1.509  
1.491  
1.393  
1.371  
1.369  
1.360  
1.251  
1.338  
1.329  
1.266  
1.264  
1.255  
1.0866  
0.851

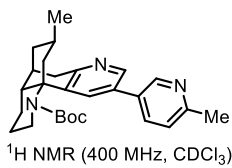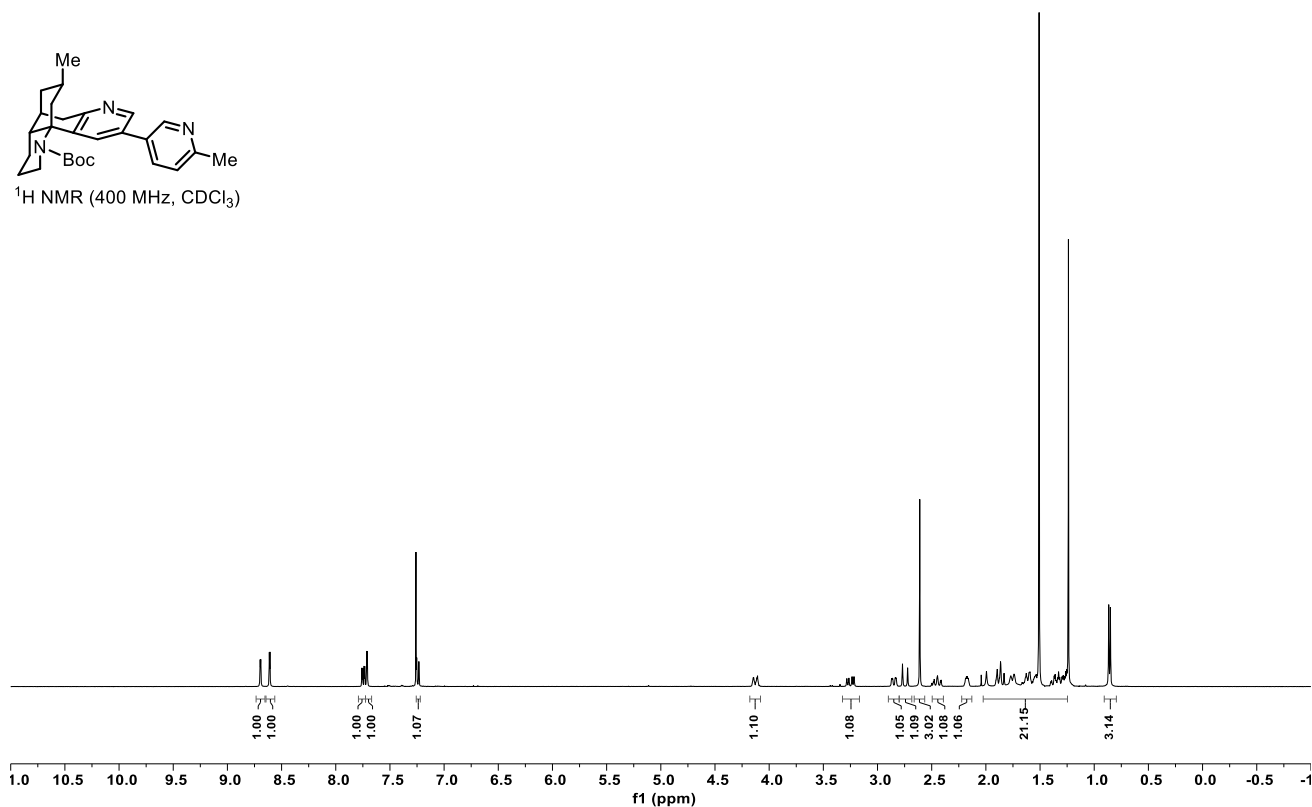

20230417-dma-iii-110.22.fid  
dma-iii-110B

158.06  
157.67  
156.48

147.36  
145.67

135.98  
134.71  
132.14  
131.99  
130.82  
123.51

80.01

64.17

48.48  
44.38  
43.11  
43.11  
35.00  
34.44  
28.72  
27.82  
26.74  
25.60  
24.32  
22.35

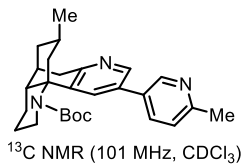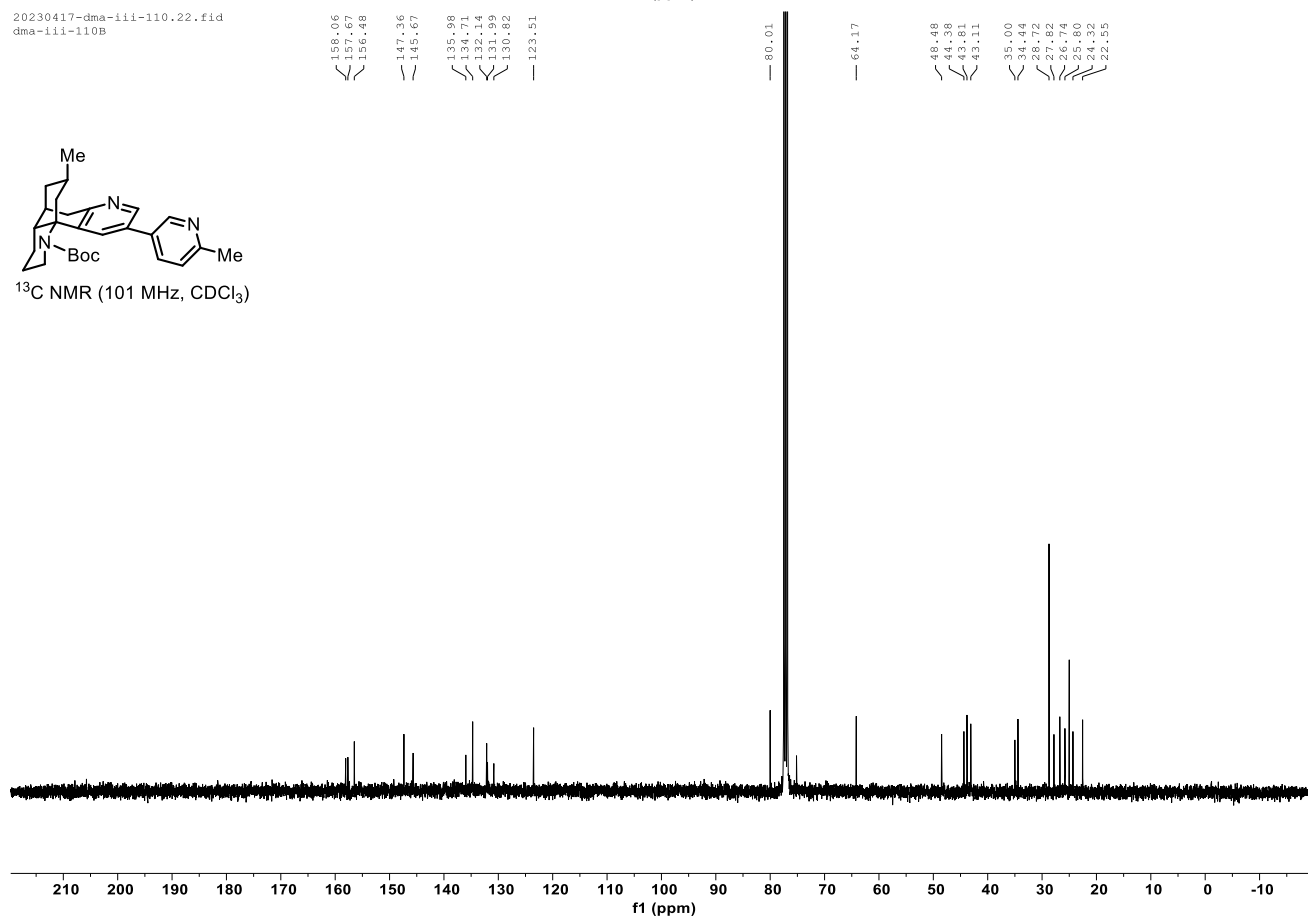

20230419-dma-iii-111.11.fid  
dma-iii-111A

8.634  
8.629  
8.456

7.739  
7.733  
7.654

4.161  
4.154  
4.148  
4.142  
4.126  
4.120  
4.114  
4.107  
3.289  
3.271  
3.265  
3.253  
2.909  
2.905  
2.900  
2.895  
2.877  
2.871  
2.865  
2.863  
2.778  
2.730  
2.490  
2.482  
2.459  
2.453  
2.452  
2.448  
2.425  
2.417  
2.403  
2.396  
2.378  
2.376  
2.178  
2.169  
1.911  
1.902  
1.895  
1.886  
1.879  
1.874  
1.743  
1.736  
1.633  
1.606  
1.599  
1.551  
1.477  
1.471  
1.541  
1.517  
1.405  
1.395  
1.272  
1.266  
1.265  
1.247  
1.242  
0.868  
0.852

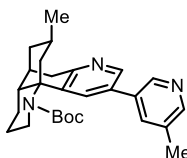

<sup>1</sup>H NMR (400 MHz, CDCl<sub>3</sub>)

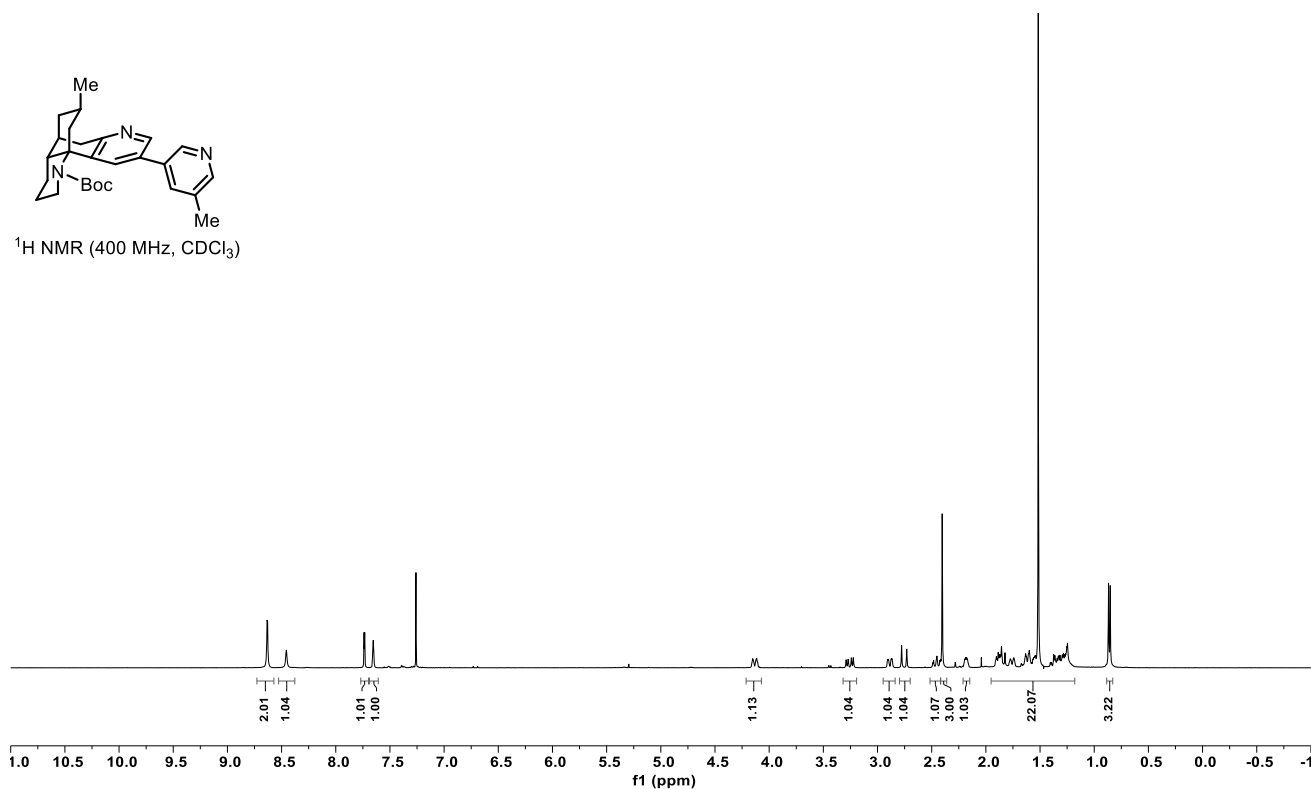

20230419-dma-iii-111.12.fid  
dma-iii-111A

157.90  
156.57  
149.68  
145.69  
145.29  
135.98  
134.86  
133.21  
132.40  
131.93

80.04

64.18

48.44  
44.42  
43.14  
43.10  
35.00  
34.44  
28.70  
27.80  
26.74  
25.78  
22.53  
18.68

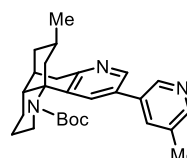

<sup>13</sup>C NMR (101 MHz, CDCl<sub>3</sub>)

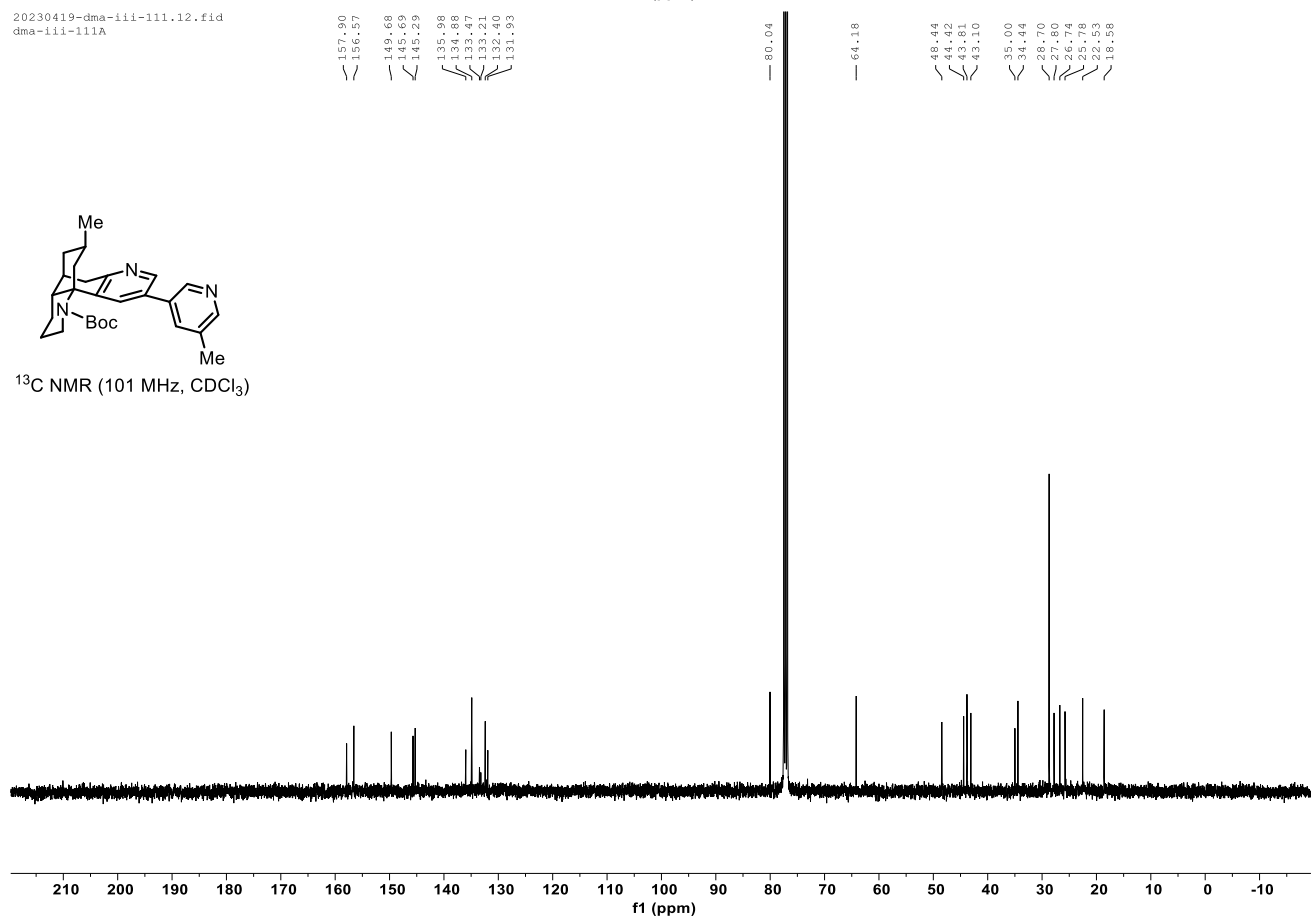

20230419-dma-iii-111.21.fid  
 dma-iii-111B

8.931  
 8.931  
 8.931  
 8.674  
 8.668  
 8.237  
 8.237  
 8.215  
 8.215  
 8.015  
 8.009  
 7.994  
 7.786  
 7.781

4.158  
 4.142  
 4.142  
 4.132  
 4.124  
 4.119  
 4.041  
 3.900  
 3.892  
 3.852  
 3.234  
 2.903  
 2.898  
 2.893  
 2.888  
 2.885  
 2.880  
 2.855  
 2.795  
 2.747  
 2.483  
 2.475  
 2.465  
 2.445  
 2.441  
 2.418  
 2.411  
 2.204  
 2.197  
 2.180  
 2.180  
 1.923  
 1.914  
 1.907  
 1.890  
 1.882  
 1.874  
 1.866  
 1.826  
 1.780  
 1.748  
 1.639  
 1.612  
 1.603  
 1.594  
 1.550  
 1.543  
 1.528  
 1.506  
 1.272  
 1.264  
 1.260  
 1.246  
 1.236  
 0.872  
 0.856

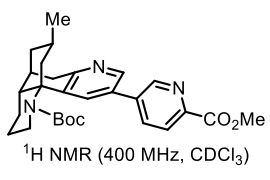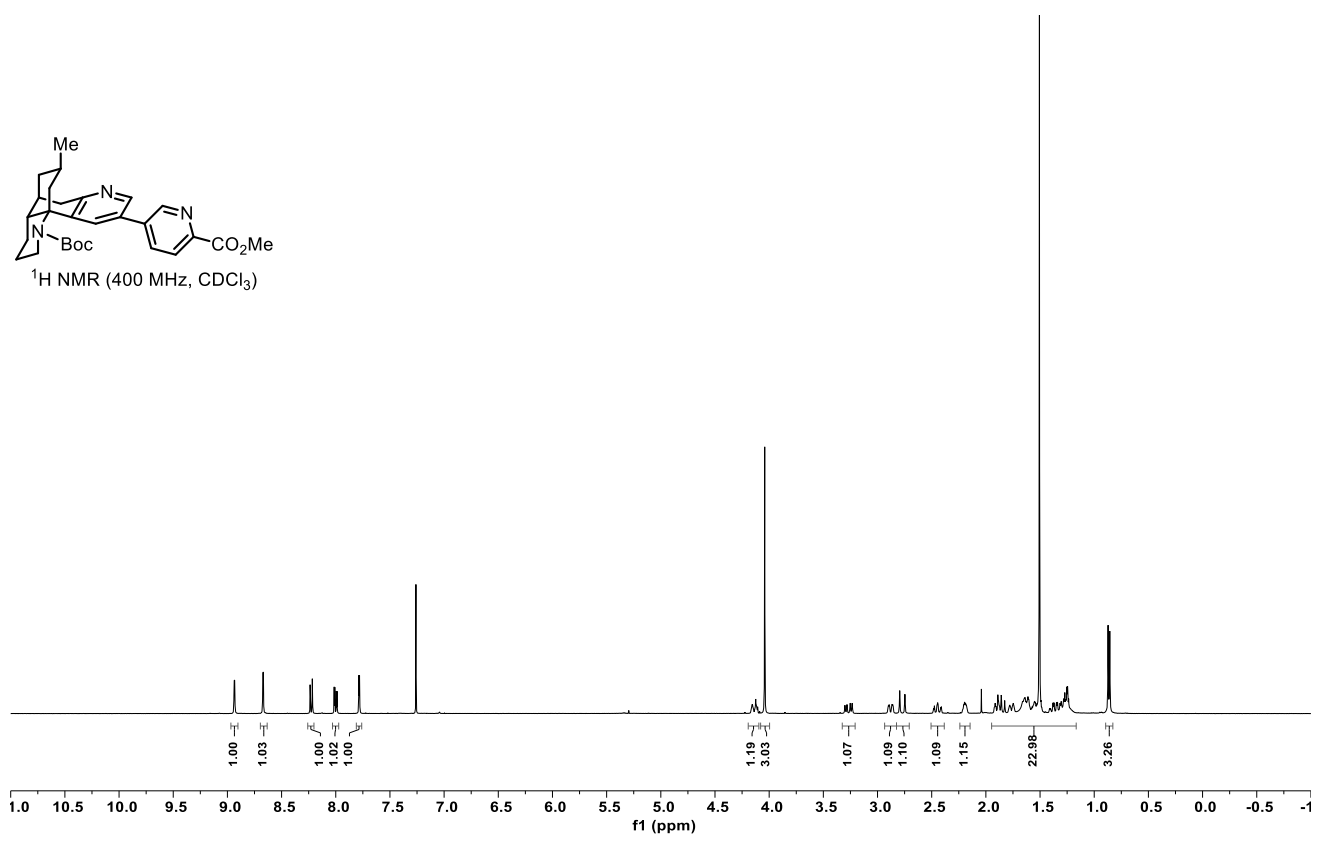

20230419-dma-iii-111.22.fid  
 dma-iii-111B

165.63  
 159.10  
 156.46  
 148.07  
 147.10  
 145.90  
 137.02  
 136.36  
 135.17  
 132.56  
 130.82  
 125.49

80.12  
 64.08  
 53.19  
 48.37  
 44.44  
 43.77  
 43.04  
 35.11  
 34.38  
 28.72  
 27.80  
 26.72  
 25.74  
 22.51

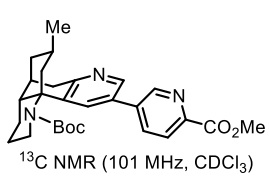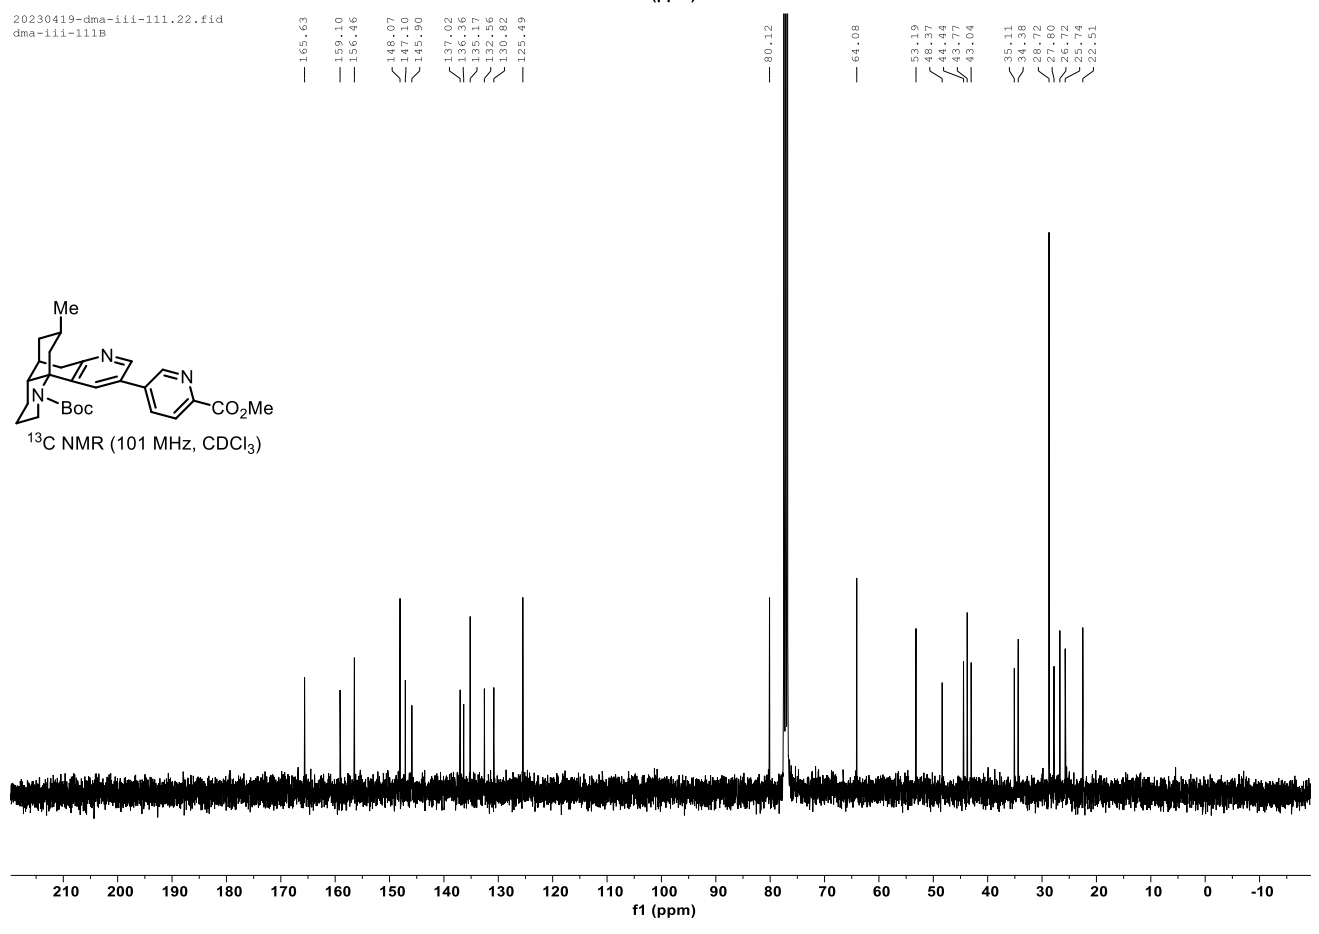

20230422-dma-iii-113.10.fid | dma-iii-113A

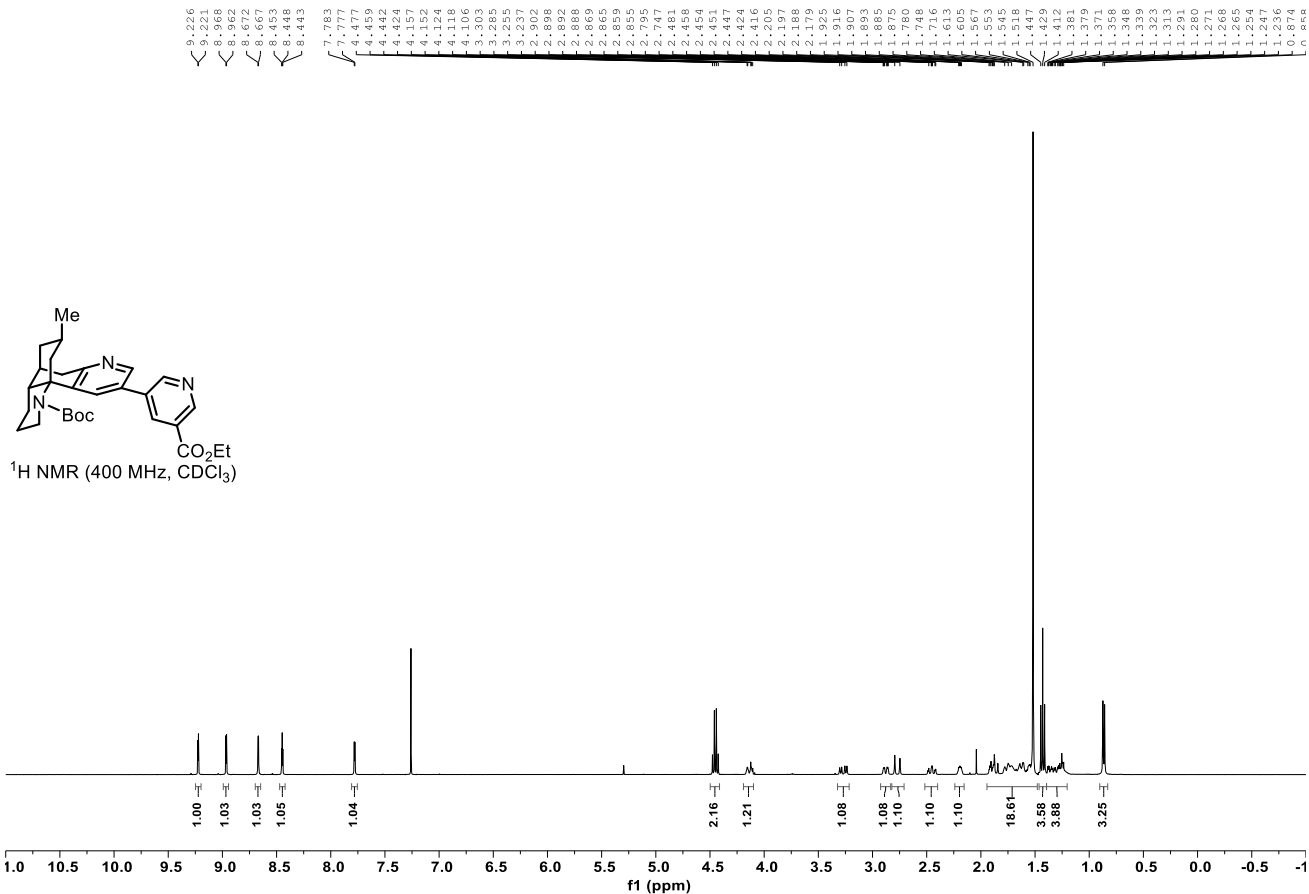

20230424-dma-iii-113B.10.fid

8.829 8.821 8.696 8.388 8.384 7.647 7.639 7.637 7.260 4.130 4.126 4.123 4.111 4.107 4.084 3.310 3.298 3.278 3.266 2.817 2.814 2.808 2.795 2.792 2.788 2.783 2.751 2.442 2.421 2.419 2.417 2.414 2.398 2.398 2.182 2.180 1.910 1.904 1.899 1.889 1.883 1.878 1.858 1.856 1.836 1.777 1.774 1.769 1.752 1.748 1.655 1.651 1.647 1.631 1.627 1.622 1.616 1.601 1.595 1.559 1.555 1.552 1.549 1.543 1.535 1.533 1.531 1.514 1.439 1.374 1.366 1.362 1.354 1.254 1.251 1.345 1.341 1.273 1.269 1.266 1.263 1.258 1.254 1.249 1.238 1.238 1.078 0.873 0.862

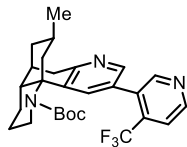

<sup>1</sup>H NMR (600 MHz, CDCl<sub>3</sub>)

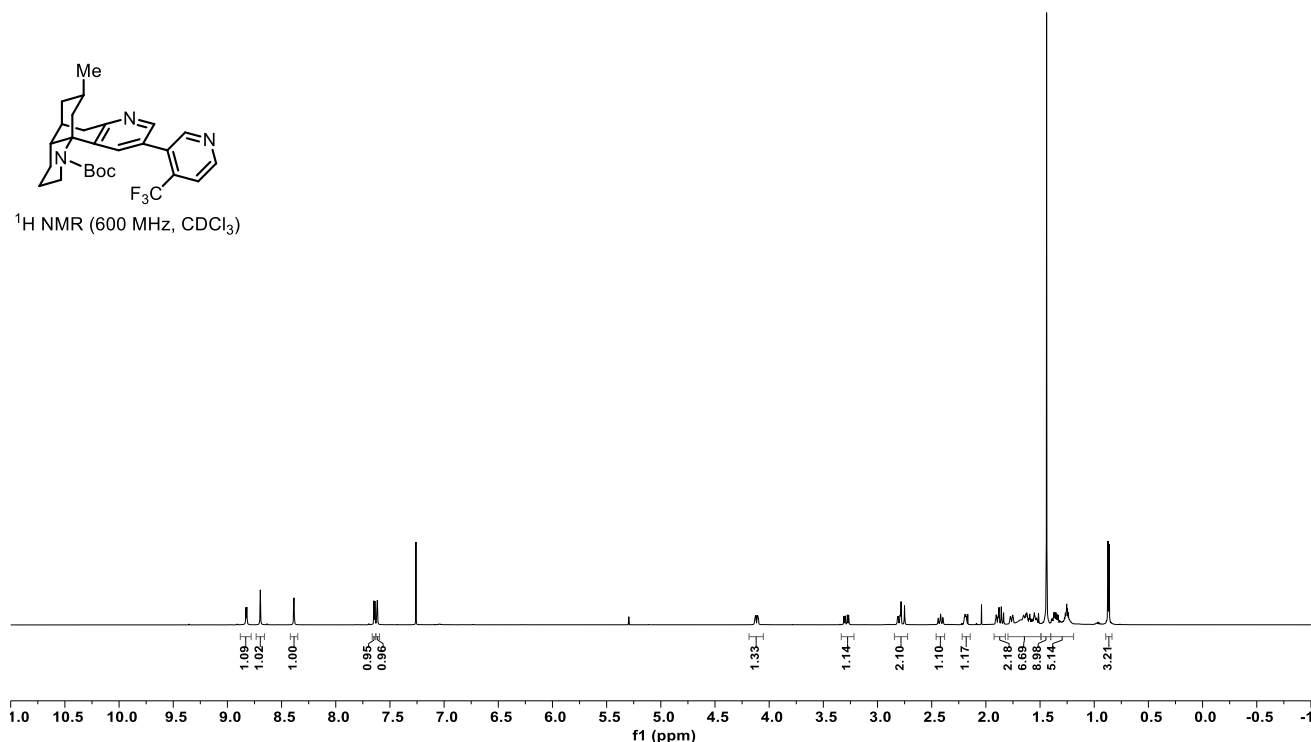

20230424-dma-iii-113B.12.fid  
13C

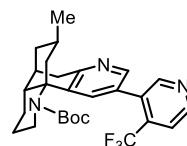

<sup>13</sup>C NMR (151 MHz, CDCl<sub>3</sub>)

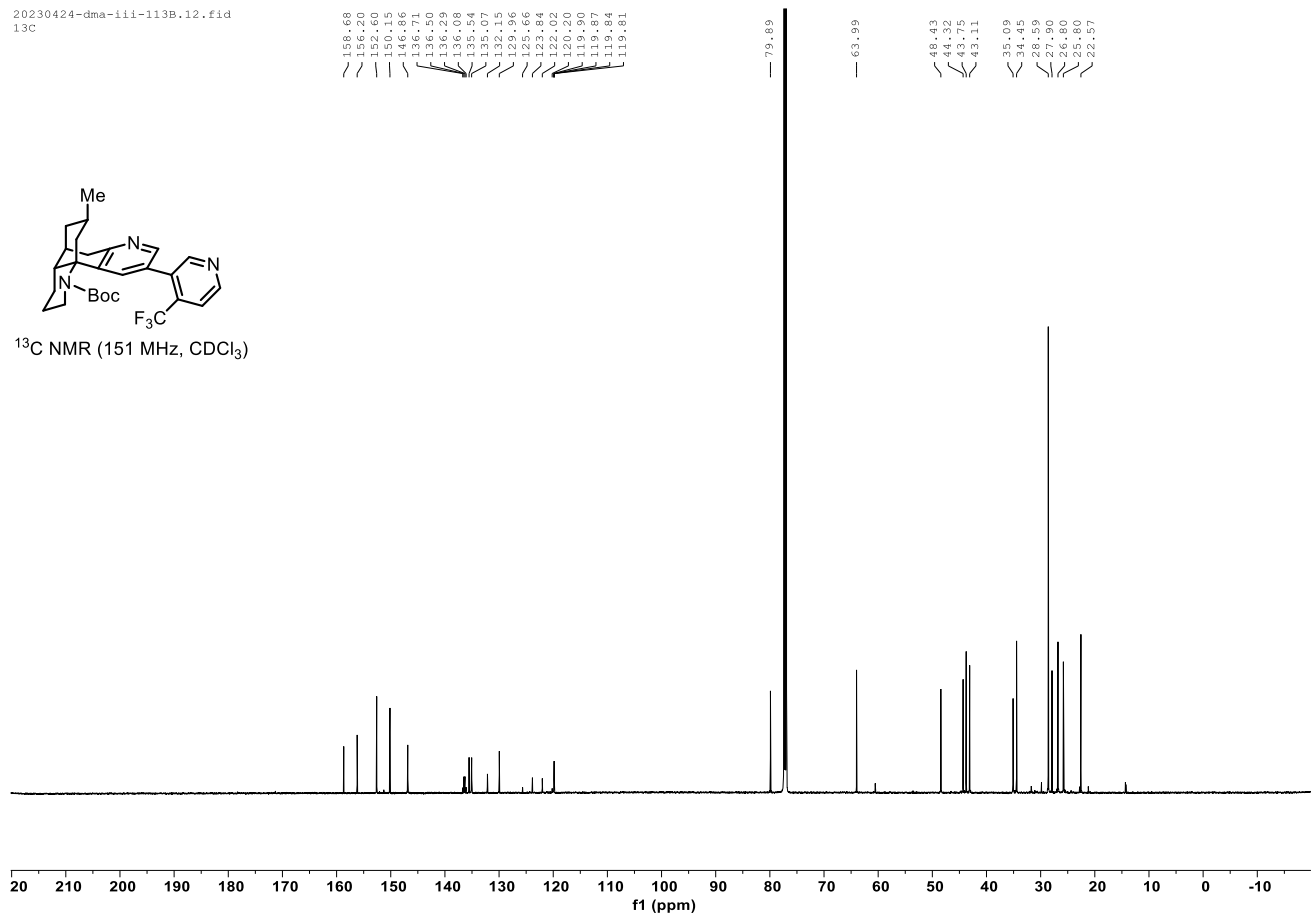

20230424-dma-iii-113B.11.fid  
19F

-56.95

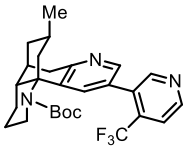

<sup>19</sup>F NMR (565 MHz, CDCl<sub>3</sub>)

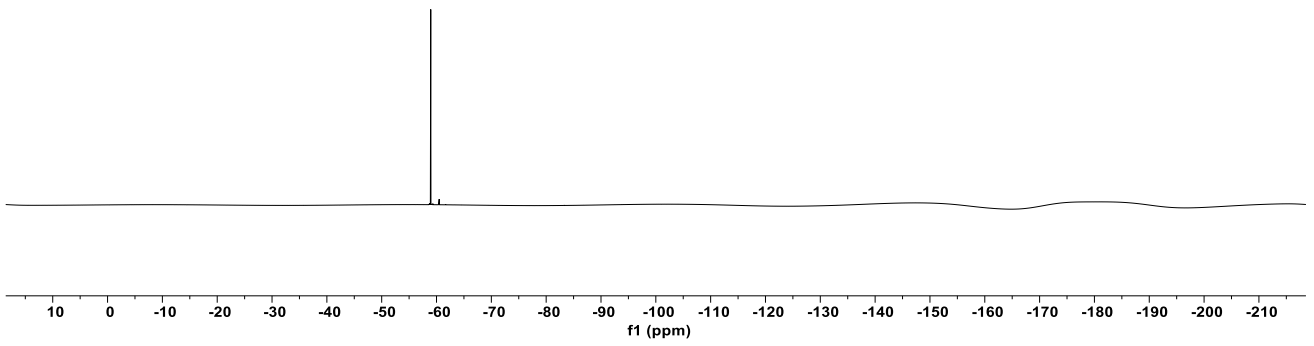

Supplement: NIHMS1985596-supplement-SI.pdf [file NIHMS1985596-supplement-SI.pdf]
